# Supplementary material for: Natural Selection on Functional Modules, a Genome-Wide Analysis
Source: PubMed Central journal article supplement (PMC3048381; doi:10.1371/journal.pcbi.1001093), 2011-03-03
Supplement: pcbi.1001093.s002.pdf [file pcbi.1001093.s002.pdf]



| D. melanogast. |    |          |                | D. simulans |    |          |                | D. sechellia |    |          |                | D. yakuba |    |          |                | D. erecta |    |          |                |                                                    |                                                        |
|----------------|----|----------|----------------|-------------|----|----------|----------------|--------------|----|----------|----------------|-----------|----|----------|----------------|-----------|----|----------|----------------|----------------------------------------------------|--------------------------------------------------------|
| dS             | dN | $\omega$ | $\Delta\omega$ | dS          | dN | $\omega$ | $\Delta\omega$ | dS           | dN | $\omega$ | $\Delta\omega$ | dS        | dN | $\omega$ | $\Delta\omega$ | dS        | dN | $\omega$ | $\Delta\omega$ |                                                    |                                                        |
| 37             | 10 | 22       |                |             |    |          |                | 20           | 22 |          |                | 17        | 18 | 26       |                | 12        | 13 | 16       |                | GO:0030029 (122) actin filament-based process      |                                                        |
| 8              | 6  | 18       | 80             | 15          | 12 |          | 59             | 60           | 6  | 33       |                | 7         | 8  | 15       | 92             | 6         | 7  | 6        | 92             | GO:0048856 (1134) anatomical structure development |                                                        |
| 30             | 12 | 20       |                |             |    |          |                | 27           | 15 | 67       |                | 10        | 8  | 17       | 74             | 25        | 12 | 12       | 68             | GO:0010926 (525) anatomical structure formation    |                                                        |
| 40             | 31 |          | 62             |             | 13 |          |                | 9            | 36 |          |                | 10        | 14 | 9        |                | 8         | 10 | 17       |                | GO:0007610 (257) behavior                          |                                                        |
|                | 35 | 42       |                |             |    |          |                |              |    |          |                |           | 72 |          |                |           | 59 | 55       |                |                                                    | GO:0022610 (127) biological adhesion                   |
| 11             | 5  | 13       |                | 15          | 11 |          | 59             | 28           | 6  | 24       |                | 5         | 7  | 10       | 88             | 5         | 5  | 5        | 75             | GO:0065007 (1771) biological regulation            |                                                        |
| 15             | 9  |          |                |             | 11 |          |                | 60           | 14 | 28       |                | 9         | 6  | 19       | 75             | 12        | 5  | 11       | 82             | GO:0009058 (1141) biosynthetic process             |                                                        |
|                | 34 | 42       |                |             |    |          |                |              |    |          |                |           | 65 |          |                |           | 59 | 67       |                |                                                    | GO:0007155 (126) cell adhesion                         |
|                | 6  | 11       | 56             | 16          | 11 |          | 62             | 15           | 38 | 68       |                | 5         | 8  | 10       | 89             | 6         | 6  | 6        |                | GO:0007154 (883) cell communication                |                                                        |
|                | 7  | 16       | 67             | 39          | 7  |          |                | 54           | 8  | 15       | 57             | 15        | 10 | 10       | 73             |           | 7  | 12       | 72             |                                                    | GO:0007049 (413) cell cycle                            |
|                | 34 | 31       |                |             |    |          |                | 22           | 36 |          |                | 19        | 12 | 27       |                | 35        | 30 | 30       | 85             |                                                    | GO:0051301 (108) cell division                         |
| 52             | 38 | 54       |                |             |    |          |                | 80           | 52 | 59       |                | 19        | 16 | 35       |                | 23        | 85 |          |                |                                                    | GO:0008037 (42) cell recognition                       |
| 39             | 12 | 17       |                |             |    |          |                | 28           | 17 |          |                | 17        | 8  | 18       | 82             |           | 12 | 13       | 69             |                                                    | GO:0044085 (411) cellular component biogenesis         |
| 15             | 6  | 14       |                | 36          | 12 | 35       | 69             | 53           | 7  | 13       | 65             | 5         | 8  | 6        | 71             | 5         | 6  | 6        | 65             |                                                    | GO:0016043 (1285) cellular component organization      |
| 9              | 7  | 19       | 81             | 20          | 12 |          | 64             | 61           | 6  | 30       |                | 7         | 10 | 15       |                | 7         | 7  | 11       | 77             |                                                    | GO:0048869 (776) cellular developmental process        |
|                | 17 | 21       |                |             | 12 |          |                | 63           | 7  | 25       | 69             | 16        | 9  | 13       |                | 10        | 14 | 7        | 75             |                                                    | GO:0051641 (388) cellular localization                 |
|                |    |          |                |             |    |          |                |              |    |          |                | 19        | 17 | 73       |                | 41        |    |          |                |                                                    | GO:0007623 (46) circadian rhythm                       |
| 36             |    |          |                |             |    |          |                | 59           |    |          |                | 8         | 46 |          |                | 20        |    |          |                |                                                    | GO:0016265 (161) death                                 |
|                | 75 |          |                |             |    |          |                |              |    |          |                | 17        | 68 | 78       |                | 28        | 31 |          |                |                                                    | GO:0048589 (57) developmental growth                   |
| 8              | 6  | 18       |                | 16          | 12 |          | 73             | 63           | 5  | 28       |                | 6         | 8  | 14       |                | 6         | 6  | 10       | 75             |                                                    | GO:0032502 (1367) developmental process                |
|                | 14 | 18       |                |             | 44 |          |                | 83           | 15 | 13       | 65             | 52        | 6  | 14       | 52             |           | 11 | 10       | 67             |                                                    | GO:0051234 (1083) establishment of localization        |
|                | 72 |          | 89             |             |    |          |                |              | 79 |          |                | 11        | 61 | 79       |                | 25        | 26 |          |                |                                                    | GO:0040007 (118) growth                                |
|                |    |          |                |             |    |          |                |              |    |          |                |           | 36 | 26       |                |           | 24 | 30       |                |                                                    | GO:0006955 (97) immune response                        |
|                | 9  | 17       |                |             | 43 |          |                | 83           | 15 | 17       |                | 9         | 6  | 19       | 70             | 8         | 10 | 14       | 67             |                                                    | GO:0051179 (1332) localization                         |
| 41             | 13 | 29       | 79             |             |    |          | 66             | 48           | 51 |          |                | 9         | 11 | 41       |                | 14        | 26 | 23       |                |                                                    | GO:0051674 (232) localization of cell                  |
|                | 14 |          |                |             | 14 |          |                | 10           | 53 |          |                | 12        | 13 | 18       |                | 9         | 10 | 26       |                |                                                    | GO:0040011 (175) locomotion                            |
|                | 7  | 17       |                |             | 14 |          |                | 42           | 7  | 25       |                | 17        | 10 | 8        |                | 19        | 15 | 10       | 80             |                                                    | GO:0033036 (304) macromolecule localization            |
|                | 8  | 19       |                |             | 15 |          |                | 9            | 15 | 61       |                | 11        | 12 | 13       | 77             |           | 9  | 8        | 69             |                                                    | GO:0007017 (289) microtubule-based process             |
|                |    |          |                |             |    |          |                |              |    |          |                | 22        | 12 |          |                | 25        | 15 | 26       |                |                                                    | GO:0051704 (154) multi-organism process                |
| 12             | 6  | 18       |                | 16          | 12 |          |                | 60           | 6  | 29       |                | 7         | 8  | 10       |                | 6         | 7  | 6        | 75             |                                                    | GO:0007275 (1168) multicellular organismal development |
| 16             | 6  | 17       |                | 16          | 11 |          |                | 6            | 28 |          |                | 6         | 7  | 9        | 91             | 6         | 6  | 6        |                |                                                    | GO:0032501 (1477) multicellular organismal process     |
|                |    |          |                |             |    |          |                |              |    |          |                | 18        | 78 |          |                | 18        | 93 |          |                |                                                    | GO:0035265 (32) organ growth                           |
| 66             |    |          |                | 57          |    |          | 37             |              |    |          |                | 22        | 95 |          |                | 69        | 57 | 63       |                |                                                    | GO:0055114 (315) oxidation reduction                   |
|                |    |          |                |             |    |          |                |              |    |          |                |           | 64 | 64       |                |           | 80 |          |                |                                                    | GO:0043473 (42) pigmentation                           |
|                |    |          |                |             |    |          |                |              |    |          |                |           | 65 | 65       |                |           | 82 |          |                |                                                    | GO:0048066 (41) pigmentation during development        |
| 15             | 10 | 23       |                | 15          | 11 |          | 59             | 32           | 6  | 28       |                | 5         | 7  | 9        | 88             | 5         | 5  | 10       | 75             |                                                    | GO:0050789 (1623) regulation of biological process     |
| 24             | 12 | 17       |                |             | 13 | 41       |                | 57           | 8  | 16       |                | 6         | 9  | 18       |                | 11        | 7  | 7        |                |                                                    | GO:0065008 (426) regulation of biological quality      |
| 21             | 13 |          |                | 25          | 13 |          |                | 7            | 32 | 57       |                | 8         | 10 | 21       |                | 7         | 8  | 21       |                |                                                    | GO:0000003 (437) reproduction                          |
| 21             | 13 |          |                | 25          | 13 |          |                | 7            | 32 | 57       |                | 8         | 10 | 21       |                | 7         | 8  | 21       |                |                                                    | GO:0022414 (437) reproductive process                  |
|                |    |          | 98             |             |    |          |                | 10           |    |          |                | 9         | 14 | 16       |                |           | 27 | 32       |                |                                                    | GO:0009628 (131) response to abiotic stimulus          |
|                |    |          |                |             |    |          |                |              |    |          |                |           | 29 | 28       |                |           | 22 | 29       |                |                                                    | GO:0009607 (85) response to biotic stimulus            |
|                |    |          |                |             | 21 |          |                |              |    |          |                | 9         | 11 |          |                | 12        | 28 | 40       |                |                                                    | GO:0042221 (221) response to chemical stimulus         |
|                |    |          |                |             |    |          |                |              |    |          |                | 12        | 15 |          |                | 13        | 15 |          |                |                                                    | GO:0009605 (129) response to external stimulus         |
|                |    |          |                |             |    |          |                |              | 6  |          |                | 6         | 7  |          |                | 9         | 6  |          |                |                                                    | GO:0050896 (724) response to stimulus                  |
|                |    |          |                |             |    |          |                |              |    |          |                | 19        | 17 | 73       |                | 41        |    |          |                |                                                    | GO:0048511 (46) rhythmic process                       |
| 22             | 13 |          |                |             | 12 |          |                | 17           | 31 | 58       |                | 8         | 10 |          |                | 6         | 7  | 21       |                |                                                    | GO:0019953 (380) sexual reproduction                   |
|                | 7  |          | 60             |             | 11 |          |                | 27           |    |          |                | 11        | 10 | 17       |                | 7         | 7  | 7        |                |                                                    | GO:0003008 (392) system process                        |

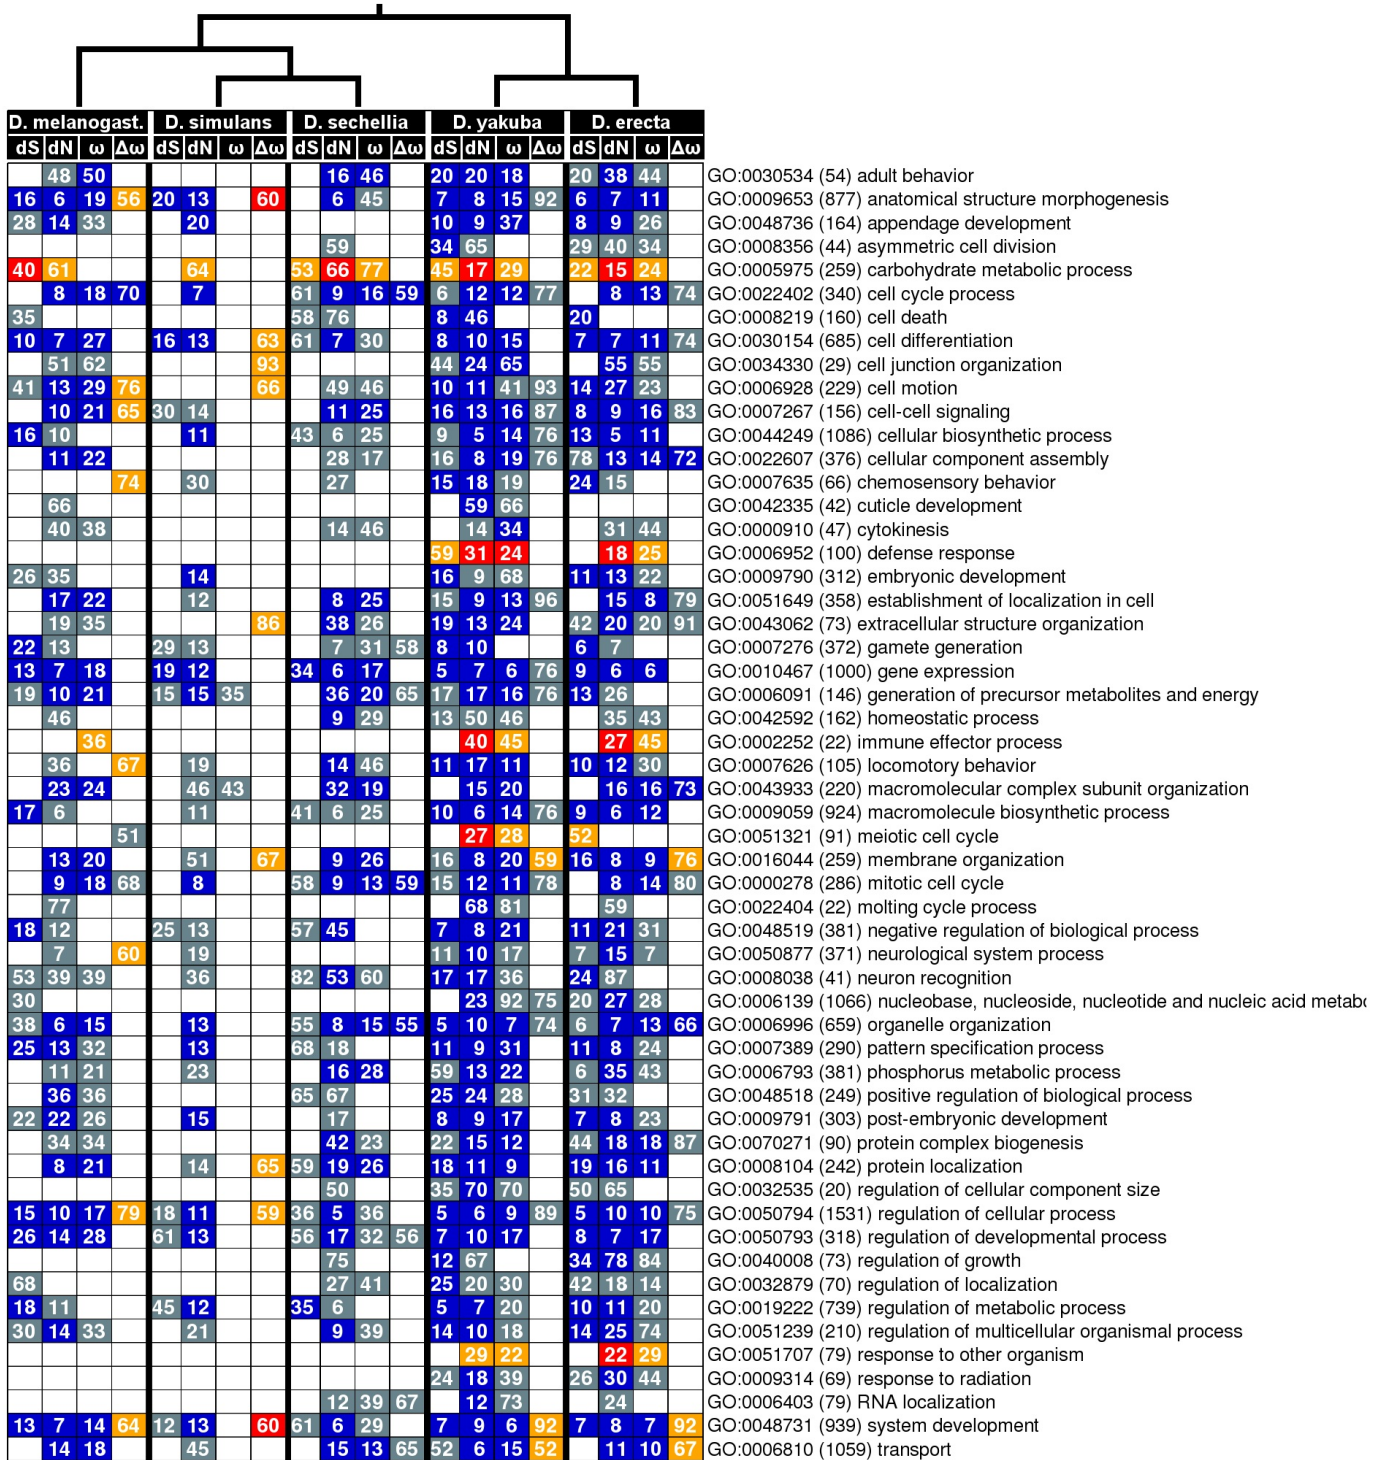



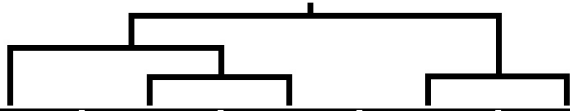

| D. melanogast |    |    |    | D. simulans |    |    |    | D. sechellia |    |    |    | D. yakuba |    |    |    | D. erecta |    |    |    |
|---------------|----|----|----|-------------|----|----|----|--------------|----|----|----|-----------|----|----|----|-----------|----|----|----|
| dS            | dN | ω  | Δω | dS          | dN | ω  | Δω | dS           | dN | ω  | Δω | dS        | dN | ω  | Δω | dS        | dN | ω  | Δω |
| 64            | 30 | 34 |    | 43          |    |    |    | 23           | 63 |    |    | 23        | 26 | 43 |    | 26        | 43 | 36 |    |
|               |    |    |    | 32          |    |    |    | 27           | 42 |    |    | 18        | 25 |    |    | 18        | 10 | 23 |    |
| 34            | 14 |    |    |             |    |    |    | 23           | 39 |    |    | 35        | 15 | 26 |    | 26        | 19 |    |    |
| 28            | 14 | 38 |    | 20          |    |    |    |              |    |    |    | 12        | 12 |    |    | 12        | 23 |    |    |
| 34            |    |    |    | 26          |    |    |    | 23           | 35 | 63 |    | 10        | 9  | 44 |    | 8         | 9  | 26 |    |
| 18            | 6  | 24 |    | 30          | 12 |    |    | 37           | 6  | 26 |    | 31        | 12 | 20 |    | 22        | 20 | 27 |    |
|               |    |    |    |             |    |    |    | 51           |    |    |    | 5         | 7  | 15 |    | 9         | 6  | 12 |    |
| 8             | 19 | 72 |    | 7           |    |    |    | 64           | 8  | 16 | 60 | 6         | 11 | 11 | 78 | 36        | 41 | 45 | 91 |
| 11            | 7  | 26 |    | 21          | 13 |    | 85 | 62           | 7  | 30 |    | 8         | 10 | 16 |    | 7         | 8  | 11 | 70 |
| 27            | 15 | 33 |    | 13          |    |    |    | 9            |    |    |    | 19        | 9  | 70 |    | 15        | 8  | 46 |    |
| 14            |    |    |    |             |    |    |    | 48           | 53 |    |    | 11        | 11 |    |    | 15        | 26 |    |    |
| 66            | 62 |    |    |             |    |    |    | 44           | 25 | 37 |    | 44        | 25 | 37 |    | 59        | 59 |    |    |
| 17            | 7  | 20 | 76 | 24          | 12 |    |    | 16           | 35 |    |    | 7         | 10 | 11 | 91 | 7         | 7  | 23 | 81 |
| 31            | 24 |    |    | 47          |    |    |    | 32           | 19 |    |    | 19        | 19 |    |    | 15        | 17 | 73 |    |
| 17            | 6  |    |    | 11          |    |    |    | 41           | 6  | 25 |    | 10        | 6  | 14 | 76 | 9         | 6  | 12 |    |
| 24            | 67 |    |    | 16          |    |    |    | 31           | 38 |    |    | 30        | 10 | 16 |    | 21        | 10 |    |    |
| 91            |    |    |    | 58          |    |    |    |              |    |    |    | 60        | 27 | 34 |    | 50        | 51 |    |    |
|               |    |    |    |             |    |    |    | 54           | 54 |    |    | 54        | 54 |    |    | 45        | 54 |    |    |
| 25            | 42 |    |    |             |    |    |    | 24           | 31 |    |    | 15        | 11 | 16 | 14 | 22        | 14 | 19 | 46 |
| 18            | 10 | 20 |    | 7           |    |    |    | 63           | 10 | 13 | 56 | 7         | 15 | 12 | 78 | 8         | 11 | 7  | 70 |
| 31            | 31 |    |    | 23          | 39 | 43 |    | 41           | 43 |    |    | 25        | 15 |    |    | 13        |    |    |    |
| 31            | 68 |    | 65 | 17          |    |    |    | 15           | 15 | 34 |    | 15        | 15 | 34 |    | 10        | 12 | 17 |    |
| 16            | 30 |    |    |             |    |    |    | 18           | 35 | 51 |    | 18        | 35 | 51 |    | 14        | 10 | 53 |    |
| 10            | 23 |    |    | 17          | 44 | 67 | 55 | 22           | 31 |    |    | 18        | 12 | 11 |    | 12        | 20 | 13 |    |
| 15            |    | 80 |    |             |    |    |    | 15           | 17 | 53 |    | 21        | 17 | 53 |    | 26        | 17 | 60 |    |
| 25            | 22 |    |    |             |    |    |    | 21           | 12 | 26 |    | 14        | 17 | 16 |    | 14        | 17 | 16 |    |
| 26            | 13 | 23 |    | 14          |    |    |    | 8            | 29 | 58 |    | 13        | 10 | 65 |    | 12        | 8  | 22 |    |
| 80            | 13 | 23 |    | 27          | 27 |    |    | 45           | 13 | 37 |    | 17        | 16 | 31 |    | 25        | 33 | 17 |    |
| 32            | 34 |    |    | 26          |    |    |    | 26           | 34 | 76 |    | 23        |    |    |    | 19        |    |    |    |
| 24            | 38 |    |    | 19          |    | 70 |    |              |    |    |    | 9         | 9  | 38 |    | 14        | 9  | 25 |    |
| 22            | 26 |    |    | 23          | 15 |    |    | 17           |    |    |    | 8         | 9  | 17 |    | 7         | 8  | 24 |    |
| 18            | 22 |    |    | 13          |    |    |    | 8            | 21 |    |    | 76        | 8  | 8  |    | 12        | 14 |    |    |
| 46            | 52 |    |    |             |    |    |    | 20           | 23 |    |    | 12        | 8  |    |    | 7         | 8  | 67 |    |
| 43            | 18 | 43 |    | 28          |    |    |    | 31           | 21 |    |    | 21        | 31 | 46 |    | 28        | 21 | 40 |    |
| 29            | 30 |    |    | 43          | 45 |    |    | 31           | 20 |    |    | 16        | 23 |    |    | 15        | 16 | 81 |    |
| 45            |    |    |    |             |    |    |    | 20           | 41 |    |    | 66        |    |    |    | 54        | 41 | 54 |    |
| 17            |    | 17 | 17 | 34          |    |    |    | 65           | 12 | 11 |    | 12        | 11 |    |    |           |    |    |    |
| 17            | 22 |    |    | 34          |    | 70 |    | 8            | 27 |    |    | 18        | 10 | 14 | 61 | 12        | 9  | 11 | 77 |
| 26            | 22 | 45 |    | 16          |    |    |    | 8            |    |    |    | 9         | 10 | 17 |    | 7         | 9  | 24 |    |
| 46            | 26 |    |    |             |    |    |    | 65           | 68 |    |    | 21        | 19 | 31 |    | 39        | 63 |    |    |
| 23            | 12 |    |    | 26          | 14 |    |    | 62           | 40 |    |    | 7         | 9  | 17 |    | 7         | 7  | 22 |    |
| 33            | 17 |    |    | 68          | 16 |    |    | 73           | 41 |    |    | 10        | 12 | 36 |    | 10        | 27 | 57 |    |
| 24            |    |    |    |             |    |    |    | 64           | 46 |    |    | 18        | 9  | 86 |    | 21        | 32 |    |    |
| 18            | 7  | 28 | 66 | 59          | 12 |    | 62 | 8            | 35 |    |    | 7         | 9  | 16 | 81 | 7         | 8  | 12 | 78 |
| 75            | 12 | 30 |    | 33          | 30 |    |    | 12           | 41 |    |    | 23        | 13 | 28 |    | 22        | 30 | 15 |    |
| 57            | 70 |    |    |             |    |    |    | 29           | 23 | 63 |    | 35        |    |    |    | 22        | 12 |    |    |
|               |    |    |    | 74          | 70 | 30 |    |              |    |    |    | 12        | 16 |    |    | 22        | 12 |    |    |
| 43            | 41 |    |    |             |    |    |    | 52           | 53 |    |    | 24        | 10 | 35 |    | 46        | 39 | 40 |    |
| 17            | 6  | 26 |    | 16          | 13 |    | 61 | 61           | 6  | 34 |    | 7         | 9  | 16 |    | 7         | 8  | 7  |    |
| 86            |    |    |    |             |    |    |    |              |    |    |    | 46        | 46 |    |    | 60        | 46 |    |    |
| 11            | 21 |    |    | 23          |    |    |    | 16           | 28 |    |    | 59        | 13 | 22 |    | 6         | 35 | 43 |    |
| 64            | 30 | 34 |    | 41          |    |    |    | 28           | 35 |    |    | 17        | 24 |    |    | 17        | 9  | 22 |    |
| 36            |    |    |    |             |    |    |    | 68           | 71 |    |    | 25        | 23 | 36 |    | 35        | 32 |    |    |
| 26            | 22 | 35 |    | 23          | 16 |    |    | 8            |    |    |    | 8         | 10 | 18 |    | 7         | 9  | 24 |    |
| 85            |    |    |    |             |    |    |    |              |    |    |    | 42        | 50 |    |    | 64        | 50 |    |    |
| 64            |    |    |    |             |    |    |    | 60           |    |    |    | 36        | 46 |    |    | 12        |    |    |    |
| 25            | 13 | 32 |    | 13          |    |    |    | 68           | 18 |    |    | 11        | 9  | 27 |    | 16        | 24 | 24 |    |
| 39            | 34 |    |    |             |    |    |    |              |    |    |    | 26        | 26 | 39 |    | 47        | 34 | 52 |    |
| 30            | 19 | 23 |    | 33          | 16 |    |    | 60           | 21 | 36 |    | 9         | 14 | 14 |    | 10        | 9  | 14 |    |
| 20            |    |    |    | 11          |    |    |    |              |    |    |    | 14        | 72 |    |    | 9         | 42 | 82 |    |
|               | 56 |    |    |             |    |    | 80 |              |    |    |    | 24        | 49 | 64 |    | 11        | 28 | 38 |    |
| 34            | 19 | 25 |    | 17          |    |    |    | 72           | 79 |    |    | 53        | 67 |    |    | 25        |    |    |    |
| 29            | 17 | 30 |    | 15          |    |    |    | 69           | 10 | 32 |    | 16        | 13 | 23 |    | 16        | 16 | 15 |    |
|               |    |    |    | 21          |    |    |    | 67           | 22 | 31 |    | 8         | 12 | 22 |    | 24        | 15 | 17 |    |
| 17            | 61 |    |    | 11          |    |    |    | 19           | 43 | 78 |    | 43        | 14 | 41 |    | 29        | 29 |    |    |
|               |    |    |    |             |    |    |    | 42           | 70 |    |    | 10        | 10 | 81 |    | 9         | 21 | 20 |    |
|               |    |    |    |             |    |    |    |              |    |    |    | 42        | 42 |    |    | 31        | 42 |    |    |
| 18            | 10 |    |    | 37          | 11 |    |    | 35           | 6  |    |    | 70        | 88 | 81 |    | 88        |    |    |    |
|               |    |    |    |             |    |    |    |              |    |    |    | 11        | 6  | 78 |    | 10        | 11 | 20 |    |
| 78            | 12 | 27 |    | 30          | 27 |    |    | 11           | 41 |    |    | 15        | 14 | 19 |    | 15        | 11 | 15 |    |
| 11            | 14 |    |    | 23          | 11 |    | 61 | 16           | 60 | 68 |    | 5         | 7  | 15 |    | 6         | 7  | 24 |    |
|               |    |    |    |             |    |    |    | 27           |    |    |    | 20        | 47 |    |    | 27        | 47 | 68 |    |
| 36            |    |    |    |             |    |    |    | 40           | 32 |    |    | 22        | 28 | 28 |    | 46        | 22 | 24 | 93 |
| 11            | 17 | 67 |    | 23          |    |    | 69 | 11           | 30 |    |    | 17        | 14 | 17 | 87 | 9         | 10 | 17 | 83 |
| 33            | 45 |    |    |             |    |    |    |              |    |    |    | 33        | 20 | 29 |    | 33        | 25 |    |    |
| 71            | 13 | 20 |    | 33          |    |    | 64 | 18           | 35 |    |    | 16        | 8  | 12 | 63 | 17        | 7  | 10 |    |

- GO:0008344 (30) adult locomotory behavior
- GO:0006040 (76) amino sugar metabolic process
- GO:0048532 (71) anatomical structure arrangement
- GO:0048646 (248) anatomical structure formation involved in morphogenesis
- GO:0035107 (163) appendage morphogenesis
- GO:0009798 (115) axis specification
- GO:0043284 (863) biopolymer biosynthetic process
- GO:0043412 (510) biopolymer modification
- GO:0022403 (301) cell cycle phase
- GO:0048468 (602) cell development
- GO:0045165 (186) cell fate commitment
- GO:0048870 (127) cell motility
- GO:0045216 (27) cell-cell junction organization
- GO:0032989 (506) cellular component morphogenesis
- GO:0034621 (182) cellular macromolecular complex subunit organization
- GO:0034645 (924) cellular macromolecule biosynthetic process
- GO:0034613 (130) cellular protein localization
- GO:0034984 (70) cellular response to DNA damage stimulus
- GO:0050000 (11) chromosome localization
- GO:0050890 (226) cognition
- GO:0007010 (353) cytoskeleton organization
- GO:0022900 (51) electron transport chain
- GO:0009792 (132) embryonic development ending in birth or egg hatching
- GO:0048598 (128) embryonic morphogenesis
- GO:0045184 (174) establishment of protein localization
- GO:0007164 (45) establishment of tissue polarity
- GO:0035272 (112) exocrine system development
- GO:0007292 (284) female gamete generation
- GO:0003001 (80) generation of a signal involved in cell-cell signaling
- GO:0006818 (52) hydrogen transport
- GO:0048737 (162) imaginal disc-derived appendage development
- GO:0002165 (288) instar larval or pupal development
- GO:0046907 (278) intracellular transport
- GO:0006811 (232) ion transport
- GO:0060173 (32) limb development
- GO:0065003 (186) macromolecular complex assembly
- GO:0032984 (24) macromolecular complex disassembly
- GO:0048232 (79) male gamete generation
- GO:0010324 (205) membrane invagination
- GO:0007552 (253) metamorphosis
- GO:0042692 (41) muscle cell differentiation
- GO:0048523 (341) negative regulation of cellular process
- GO:0051093 (103) negative regulation of developmental process
- GO:0009892 (202) negative regulation of metabolic process
- GO:0007399 (495) nervous system development
- GO:0006836 (89) neurotransmitter transport
- GO:0055086 (151) nucleobase, nucleoside and nucleotide metabolic process
- GO:0042048 (62) olfactory behavior
- GO:0007424 (123) open tracheal system development
- GO:0048513 (753) organ development
- GO:0043043 (15) peptide biosynthetic process
- GO:0006796 (381) phosphate metabolic process
- GO:0005976 (81) polysaccharide metabolic process
- GO:0048522 (226) positive regulation of cellular process
- GO:0009886 (248) post-embryonic morphogenesis
- GO:0002440 (14) production of molecular mediator of immune response
- GO:0012501 (155) programmed cell death
- GO:0003002 (274) regionalization
- GO:0032970 (23) regulation of actin filament-based process
- GO:0022603 (171) regulation of anatomical structure morphogenesis
- GO:0009889 (553) regulation of biosynthetic process
- GO:0010646 (221) regulation of cell communication
- GO:0010941 (88) regulation of cell death
- GO:0045595 (137) regulation of cell differentiation
- GO:0051128 (186) regulation of cellular component organization
- GO:0060341 (41) regulation of cellular localization
- GO:0031323 (673) regulation of cellular metabolic process
- GO:0031347 (19) regulation of defense response
- GO:0048638 (27) regulation of developmental growth
- GO:0060255 (704) regulation of macromolecule metabolic process
- GO:0009416 (59) response to light stimulus
- GO:0046903 (99) secretion
- GO:0007165 (741) signal transduction
- GO:0048863 (44) stem cell differentiation
- GO:0050808 (49) synapse organization
- GO:0019226 (140) transmission of nerve impulse
- GO:0016050 (24) vesicle organization
- GO:0016192 (288) vesicle-mediated transport

| D. melanogast. |    |    |    | D. simulans |    |    |    | D. sechellia |    |    |    | D. yakuba |    |    |    | D. erecta |    |    |    |
|----------------|----|----|----|-------------|----|----|----|--------------|----|----|----|-----------|----|----|----|-----------|----|----|----|
| dS             | dN | ω  | Δω | dS          | dN | ω  | Δω | dS           | dN | ω  | Δω | dS        | dN | ω  | Δω | dS        | dN | ω  | Δω |
| 38             | 10 | 22 |    |             |    |    |    | 20           | 23 |    |    | 17        | 18 | 26 |    | 12        | 13 | 16 |    |
| 35             |    |    |    | 25          |    |    |    | 21           | 35 |    |    | 18        | 13 | 71 |    |           | 86 | 27 |    |
|                | 85 |    |    |             |    |    |    |              |    |    |    |           | 42 | 50 |    |           | 64 | 50 |    |
|                | 52 | 52 |    |             |    |    |    | 71           |    |    |    | 56        |    |    |    | 19        |    |    |    |
|                | 54 |    |    |             |    |    |    | 76           |    |    |    | 29        | 79 |    |    | 15        | 37 |    |    |
| 24             | 14 | 20 | 70 | 32          | 12 |    | 75 | 49           | 53 |    |    | 31        | 52 |    |    | 23        | 68 |    |    |
| 39             | 15 | 32 | 77 |             | 21 |    | 63 | 16           | 36 |    |    | 7         | 9  | 16 | 91 | 6         | 7  | 11 | 81 |
|                | 49 | 71 |    |             | 13 |    | 67 | 39           | 39 |    |    | 6         | 8  | 60 |    | 6         | 7  | 50 |    |
| 18             | 6  | 24 |    | 30          | 12 |    |    | 37           | 6  | 26 |    | 5         | 7  | 15 | 9  | 9         | 6  | 12 |    |
|                | 30 | 24 |    | 35          | 48 |    |    | 32           | 20 |    |    | 21        | 22 |    |    | 15        | 18 | 83 |    |
|                | 45 |    |    |             |    |    |    | 20           | 41 |    |    | 66        |    |    |    | 54        | 41 | 54 |    |
| 41             |    |    |    |             |    |    |    |              | 40 |    |    | 30        | 16 | 30 |    | 9         | 36 | 54 |    |
|                | 34 | 36 |    |             |    |    |    | 92           | 40 | 33 |    | 91        | 89 | 82 |    | 37        | 31 | 88 |    |
|                | 37 | 40 |    |             |    |    |    |              |    |    |    | 50        | 35 | 50 |    | 57        | 64 |    |    |
|                | 31 | 69 | 66 |             | 17 |    |    | 58           |    |    |    | 54        | 28 | 41 |    | 44        | 46 |    |    |
|                | 17 | 22 |    | 34          | 70 |    |    | 8            | 27 |    |    | 16        | 15 | 34 |    | 10        | 12 | 17 |    |
|                |    |    |    |             |    |    |    |              |    |    |    | 18        | 10 | 14 | 61 | 12        | 9  | 11 | 77 |
|                |    |    |    |             |    |    |    |              |    |    |    | 54        | 54 |    |    | 45        | 54 |    |    |
|                | 46 | 51 |    | 33          |    |    |    | 33           |    |    |    | 41        | 41 | 75 |    | 33        | 58 |    |    |
| 27             |    |    |    | 27          | 23 |    |    | 45           | 65 |    |    | 56        | 17 |    |    | 20        | 84 |    |    |
|                | 26 | 22 |    |             | 15 |    |    |              |    |    |    | 18        | 14 | 22 |    | 22        | 20 | 30 |    |
|                | 64 | 30 | 34 |             | 43 |    |    | 28           | 36 |    |    | 21        | 12 | 10 |    | 15        | 18 | 17 |    |
|                | 24 | 27 |    |             |    |    |    |              |    |    |    | 16        | 18 |    |    | 14        |    |    |    |
| 20             | 12 | 35 |    | 15          | 69 |    |    | 8            |    |    |    | 9         | 11 | 22 |    | 7         | 9  | 24 |    |
|                | 24 | 37 |    | 19          |    |    |    | 9            | 9  | 37 |    | 9         | 9  | 37 |    | 14        | 9  | 26 |    |
| 26             | 22 | 36 |    | 31          | 16 |    |    | 8            |    |    |    | 9         | 10 | 18 |    | 7         | 9  | 24 |    |
|                | 12 | 19 |    | 13          | 71 |    |    | 19           | 41 |    |    | 16        | 8  | 18 |    | 7         | 8  | 14 |    |
|                | 14 |    |    | 21          |    |    |    | 38           | 42 |    |    | 21        | 21 | 15 |    | 17        | 19 |    |    |
| 43             | 18 | 43 |    | 28          |    |    |    | 31           |    |    |    | 21        | 31 | 46 |    | 28        | 21 | 40 |    |
|                | 8  | 19 | 71 | 16          |    |    |    | 9            | 21 | 60 |    | 7         | 12 | 11 | 78 | 9         | 13 | 71 |    |
|                | 31 | 43 |    |             |    |    |    | 50           |    |    |    | 43        | 25 | 37 |    | 68        | 50 | 31 |    |
| 38             | 10 | 20 |    | 9           |    |    |    | 11           | 14 | 60 |    | 13        | 14 | 13 | 79 | 12        | 11 | 17 | 70 |
|                | 33 |    |    |             |    |    |    | 53           |    |    |    | 33        | 40 | 53 |    | 26        | 26 |    |    |
| 41             | 19 | 33 |    | 15          | 71 |    |    | 28           | 40 |    |    | 18        | 14 | 86 |    | 19        | 54 |    |    |
| 30             |    |    |    |             |    |    |    | 18           | 14 | 56 |    | 18        | 14 | 56 |    | 20        | 40 |    |    |
|                | 24 |    |    | 21          |    |    |    | 67           |    |    |    | 18        | 9  | 87 |    | 16        | 24 | 24 |    |
| 24             |    |    |    |             |    |    |    | 65           | 66 |    |    | 18        | 8  | 85 |    | 16        |    |    |    |
| 22             | 7  | 31 | 79 | 40          | 13 |    | 64 | 8            | 33 |    |    | 8         | 10 | 25 |    | 7         | 8  | 16 | 79 |
|                |    |    |    | 19          |    |    |    | 14           | 48 | 69 |    |           | 21 |    |    |           | 64 |    |    |
|                | 26 | 13 |    |             | 13 |    |    | 31           | 24 | 64 |    | 36        | 34 |    |    |           |    |    |    |
| 22             | 13 | 27 | 64 | 22          | 15 |    | 67 | 8            | 9  | 22 |    | 13        | 10 | 66 |    | 12        | 8  | 22 |    |
|                | 12 | 21 |    | 25          |    |    |    | 8            |    |    |    | 8         | 9  | 22 |    | 7         | 7  | 24 |    |
|                | 34 | 34 |    |             |    |    |    | 18           | 26 | 59 | 14 | 18        | 94 | 7  | 30 | 43        | 95 |    |    |
|                | 47 |    |    |             |    |    |    | 42           | 23 | 22 | 15 | 12        |    | 44 | 18 | 18        | 87 |    |    |
|                | 10 | 23 |    | 17          | 45 |    |    | 21           | 43 |    |    | 69        |    | 34 | 43 | 39        |    |    |    |
| 35             | 20 | 31 |    | 17          |    |    |    | 61           | 23 | 32 |    | 18        | 12 | 11 |    | 16        | 20 | 13 |    |
|                |    |    |    |             |    |    |    | 63           | 12 | 35 |    | 17        | 14 | 26 |    | 15        | 23 | 24 |    |
|                | 20 |    |    | 11          |    |    |    |              |    |    |    | 56        |    |    |    | 68        |    |    |    |
| 17             |    |    |    | 41          | 11 |    |    | 39           |    |    |    | 14        | 72 |    |    | 9         | 42 | 82 |    |
|                |    |    |    |             |    |    |    |              |    |    |    | 10        | 59 | 81 |    | 9         | 20 | 29 |    |
|                | 85 |    |    |             |    |    |    |              |    |    |    | 91        | 91 |    |    | 65        | 60 |    |    |
|                | 26 |    |    |             |    |    |    |              |    |    |    | 42        | 50 |    |    | 64        | 50 |    |    |
| 67             | 21 |    |    | 72          | 18 |    |    | 14           | 69 | 93 |    | 14        | 69 | 93 |    | 9         | 42 | 82 |    |
| 20             | 75 |    |    | 10          |    |    |    | 18           | 12 | 25 |    | 18        | 12 | 25 |    | 21        | 35 | 77 |    |
|                | 80 |    |    |             |    |    |    | 14           | 63 |    |    | 14        | 63 |    |    | 10        | 25 | 30 |    |
| 11             | 9  |    |    | 27          |    |    |    | 73           |    |    |    | 52        | 62 |    |    | 25        |    |    |    |
|                | 56 |    |    |             |    |    |    | 48           | 12 | 25 |    | 16        | 14 | 10 | 81 | 13        | 10 | 27 |    |
|                | 32 | 32 |    | 24          | 40 | 44 |    | 65           |    |    |    | 32        | 49 | 64 |    | 21        | 33 | 37 |    |
|                |    |    |    |             |    |    |    | 40           | 42 |    |    | 26        | 16 |    |    | 14        |    |    |    |
| 32             |    |    |    |             |    |    |    | 59           |    |    |    | 24        | 19 | 28 | 90 | 13        | 15 | 15 |    |
| 81             | 13 | 28 |    | 29          | 27 |    |    | 12           | 42 |    |    | 24        | 13 | 19 |    | 16        | 12 | 15 |    |
| 24             | 14 | 32 |    | 23          | 13 |    | 68 | 10           |    |    |    | 16        | 15 | 28 |    | 7         | 14 | 24 |    |
|                | 27 | 48 |    |             |    |    |    | 26           | 32 |    |    | 12        | 13 | 19 | 17 | 16        | 17 | 22 | 39 |
|                | 17 | 17 | 17 | 34          |    |    |    |              |    | 65 |    | 12        | 11 |    |    |           |    |    |    |
|                | 11 | 23 | 67 | 30          | 23 |    | 68 | 11           | 30 |    |    | 18        | 14 | 18 | 87 | 9         | 10 | 17 |    |
|                | 14 | 22 |    |             |    |    |    | 50           | 16 | 45 |    | 17        | 14 | 30 |    | 16        | 13 | 19 |    |
|                |    |    |    |             |    |    |    | 80           |    |    |    | 29        | 32 | 41 |    | 54        | 38 | 38 |    |
|                | 14 | 28 |    | 13          |    |    |    | 46           |    |    |    | 8         | 10 | 17 | 92 | 14        | 9  | 14 |    |
| 27             | 31 | 34 |    |             |    |    |    | 31           | 38 | 78 |    | 23        |    |    |    | 17        |    |    |    |

- GO:0030036 (121) actin cytoskeleton organization
- GO:0009952 (98) anterior/posterior pattern formation
- GO:0002775 (14) antimicrobial peptide production
- GO:0006915 (100) apoptosis
- GO:0006576 (25) biogenic amine metabolic process
- GO:0001709 (91) cell fate determination
- GO:0001708 (51) cell fate specification
- GO:0016477 (125) cell migration
- GO:0000902 (470) cell morphogenesis
- GO:0032990 (228) cell part morphogenesis
- GO:0007166 (407) cell surface receptor linked signal transduction
- GO:0034961 (863) cellular biopolymer biosynthetic process
- GO:0034622 (155) cellular macromolecular complex assembly
- GO:0034623 (24) cellular macromolecular complex disassembly
- GO:0007417 (143) central nervous system development
- GO:0030705 (69) cytoskeleton-dependent intracellular transport
- GO:0050832 (14) defense response to fungus
- GO:0006259 (154) DNA metabolic process
- GO:0001700 (129) embryonic development via the syncytial blastoderm
- GO:0006897 (205) endocytosis
- GO:0051303 (11) establishment of chromosome localization
- GO:0007629 (12) flight behavior
- GO:0048859 (39) formation of anatomical boundary
- GO:0007281 (140) germ cell development
- GO:0048732 (129) gland development
- GO:0006041 (75) glucosamine metabolic process
- GO:0007507 (54) heart development
- GO:0007444 (287) imaginal disc development
- GO:0035114 (161) imaginal disc-derived appendage morphogenesis
- GO:0048707 (244) instar larval or pupal morphogenesis
- GO:0007242 (291) intracellular signaling cascade
- GO:0007611 (57) learning or memory
- GO:0035108 (32) limb morphogenesis
- GO:0000279 (276) M phase
- GO:0006900 (16) membrane budding
- GO:0000226 (222) microtubule cytoskeleton organization
- GO:0055001 (15) muscle cell development
- GO:0007517 (139) muscle development
- GO:0009890 (143) negative regulation of biosynthetic process
- GO:0045596 (55) negative regulation of cell differentiation
- GO:0031324 (175) negative regulation of cellular metabolic process
- GO:0010605 (192) negative regulation of macromolecule metabolic process
- GO:0022008 (366) neurogenesis
- GO:0051169 (56) nuclear transport
- GO:0006753 (135) nucleoside phosphate metabolic process
- GO:0048477 (281) oogenesis
- GO:0009887 (361) organ morphogenesis
- GO:0016310 (310) phosphorylation
- GO:0006461 (90) protein complex assembly
- GO:0043241 (23) protein complex disassembly
- GO:0015031 (169) protein transport
- GO:0060284 (97) regulation of cell development
- GO:0010453 (16) regulation of cell fate commitment
- GO:0031326 (553) regulation of cellular biosynthetic process
- GO:0010468 (604) regulation of gene expression
- GO:0043087 (23) regulation of GTPase activity
- GO:0002697 (14) regulation of immune effector process
- GO:0010556 (534) regulation of macromolecule biosynthetic process
- GO:0051960 (70) regulation of nervous system development
- GO:0019219 (549) regulation of nucleobase, nucleoside, nucleotide and nucleic acid metabolic process
- GO:0043067 (87) regulation of programmed cell death
- GO:0051246 (143) regulation of protein metabolic process
- GO:0009966 (206) regulation of signal transduction
- GO:0022904 (49) respiratory electron transport chain
- GO:0016070 (687) RNA metabolic process
- GO:0032940 (91) secretion by cell
- GO:0007423 (257) sensory organ development
- GO:0007600 (173) sensory perception
- GO:0007283 (79) spermatogenesis
- GO:0007268 (138) synaptic transmission
- GO:0048489 (68) synaptic vesicle transport
- GO:0007416 (31) synaptogenesis
- GO:0009888 (281) tissue development
- GO:0034220 (47) transmembrane ion transport



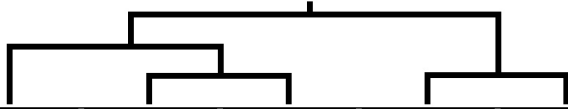

| D. melanogast. |    |    |    | D. simulans |    |    |    | D. sechellia |    |    |    | D. yakuba |    |     |     | D. erecta |    |    |    |   |
|----------------|----|----|----|-------------|----|----|----|--------------|----|----|----|-----------|----|-----|-----|-----------|----|----|----|---|
| dS             | dN | ω  | Δω | dS          | dN | ω  | Δω | dS           | dN | ω  | Δω | dS        | dN | ω   | Δω  | dS        | dN | ω  | Δω |   |
| 43             | 20 | 24 |    |             | 42 |    |    | 12           | 25 |    |    | 16        | 15 | 24  |     | 11        | 12 | 32 |    |   |
| 23             | 23 |    |    |             |    |    |    | 30           | 53 |    |    | 26        | 30 | 43  |     | 23        | 20 |    |    |   |
|                | 85 |    |    |             |    |    |    |              |    |    |    |           | 44 | 40  |     |           | 44 | 44 |    |   |
| 69             | 38 |    |    |             |    |    |    |              |    |    |    | 53        | 61 | 69  |     | 38        | 53 | 76 |    |   |
|                |    |    |    |             |    |    |    | 13           | 49 |    |    | 34        | 11 | 35  |     | 16        | 39 | 58 |    |   |
| 44             | 63 |    |    |             |    |    |    | 60           |    |    |    | 31        | 39 | 44  |     | 34        | 36 | 34 |    |   |
| 39             | 15 | 32 | 69 |             | 21 |    | 68 | 40           | 39 |    |    | 7         | 9  | 25  | 93  | 13        | 13 | 26 |    |   |
| 40             | 13 | 18 | 68 |             | 24 |    | 68 | 38           | 39 |    |    | 7         | 9  | 22  |     | 12        | 26 | 23 |    |   |
|                |    | 71 |    |             |    |    |    |              |    |    |    |           | 52 | 66  |     |           | 52 | 66 |    |   |
|                | 24 | 33 |    |             | 45 | 56 |    | 50           | 40 |    |    | 98        | 14 | 29  |     |           | 22 | 26 |    |   |
|                | 47 |    |    |             |    |    |    | 21           | 43 |    |    |           | 69 |     |     | 34        | 43 | 39 |    |   |
|                | 54 | 90 |    |             |    |    |    | 81           | 72 |    |    |           | 36 | 100 |     |           |    |    |    |   |
|                | 60 | 64 |    |             |    |    |    | 71           | 75 |    |    |           | 35 | 46  |     | 71        | 57 |    |    |   |
| 96             | 54 |    |    |             |    |    |    |              |    |    |    | 59        | 29 | 35  |     |           | 37 | 62 |    |   |
|                | 63 | 56 |    |             |    |    |    |              |    |    |    |           | 69 | 61  |     |           | 38 | 40 |    |   |
|                | 17 | 30 | 69 |             | 15 |    | 69 | 21           | 41 |    |    | 9         | 14 | 22  | 96  | 9         | 11 | 18 |    |   |
|                | 23 |    | 75 |             |    |    |    |              |    |    |    | 13        | 13 | 18  | 100 | 21        | 39 | 18 |    |   |
|                | 55 | 57 |    |             |    |    |    |              |    |    |    |           | 53 | 38  |     |           | 25 | 23 |    |   |
| 25             | 15 | 33 |    |             | 28 | 14 |    | 57           | 9  |    |    | 12        | 16 | 32  |     | 7         | 14 | 24 |    |   |
| 21             | 15 | 31 | 71 |             | 37 | 13 | 64 |              | 8  | 32 |    | 8         | 10 | 24  |     | 7         | 8  | 25 |    |   |
|                | 86 |    |    |             |    |    |    |              |    |    |    | 59        | 81 | 81  |     | 22        | 95 |    |    |   |
| 27             | 34 | 37 |    |             | 16 |    | 69 |              |    |    |    | 9         | 10 | 24  |     | 13        | 26 | 24 |    |   |
| 34             | 13 |    |    |             |    |    |    | 81           |    |    |    | 40        | 18 |     |     | 17        | 30 |    |    |   |
| 46             | 69 | 65 |    |             | 26 |    |    | 34           |    |    |    | 88        | 30 | 73  |     | 30        | 23 | 46 |    |   |
|                | 25 | 68 |    |             | 17 |    |    | 32           | 39 |    |    | 31        | 10 | 17  |     | 21        | 10 |    |    |   |
|                |    |    |    |             | 35 |    |    |              |    |    |    | 30        | 20 |     |     | 30        | 17 |    |    |   |
| 43             | 18 | 43 |    |             | 28 |    |    | 31           |    |    |    | 21        | 31 | 46  |     | 28        | 21 | 40 |    |   |
|                |    |    | 53 |             |    |    |    |              |    |    |    | 55        | 20 | 25  |     | 46        |    |    |    |   |
|                |    |    |    |             |    |    |    |              |    |    |    |           | 54 | 54  |     |           | 45 | 54 |    |   |
|                | 65 |    |    |             |    |    |    | 36           | 34 |    |    | 19        | 10 | 89  | 86  |           | 36 | 31 | 87 |   |
|                |    |    |    |             |    |    |    | 20           | 33 | 63 |    |           |    |     |     | 12        | 10 |    |    |   |
|                | 15 |    |    |             |    |    |    | 36           | 38 | 64 |    |           | 21 | 16  | 84  |           | 15 | 17 | 82 |   |
| 48             | 67 |    |    |             |    |    |    | 55           | 59 |    |    | 26        | 32 | 83  |     | 46        | 32 | 32 |    |   |
| 64             | 30 | 34 |    |             | 43 |    |    | 28           | 36 |    |    |           | 18 | 25  |     | 17        | 10 | 24 |    |   |
| 58             |    |    |    |             |    |    |    |              |    |    |    | 75        |    |     |     | 75        |    |    |    |   |
| 30             |    |    |    |             |    |    |    |              |    |    |    | 18        | 14 | 86  |     | 19        | 54 |    |    |   |
| 32             |    |    |    |             |    |    |    | 76           | 70 |    |    | 23        | 75 | 87  |     | 26        | 86 |    |    |   |
| 30             |    |    |    |             |    |    |    |              |    |    |    | 18        | 14 | 86  |     | 19        | 54 |    |    |   |
| 33             |    |    |    |             |    |    |    |              |    |    |    | 24        | 75 | 88  |     | 23        | 55 |    |    |   |
|                | 33 | 89 |    |             |    |    |    |              |    |    |    | 35        | 69 | 43  |     | 30        | 66 |    |    |   |
|                |    |    |    |             | 19 |    |    | 14           | 48 | 69 |    |           | 21 |     |     | 64        |    |    |    |   |
|                |    |    |    |             |    |    |    | 31           | 24 | 64 |    |           | 36 | 34  |     |           |    |    |    |   |
|                |    |    |    |             | 28 |    |    | 49           | 36 |    |    | 16        | 14 | 25  |     | 25        | 25 | 19 |    |   |
| 44             |    |    |    |             |    |    |    |              |    |    |    | 27        | 10 |     |     | 19        |    |    |    |   |
|                |    |    |    |             |    |    |    |              |    |    |    | 38        | 26 | 42  |     | 42        | 38 |    |    |   |
| 16             | 11 | 26 |    |             | 20 | 16 | 39 |              | 25 | 22 | 71 | 20        | 18 | 18  |     | 15        |    |    |    |   |
|                | 19 | 25 |    |             |    |    | 77 |              | 31 | 28 |    |           | 32 | 19  | 63  |           | 19 | 26 |    |   |
|                | 45 | 40 |    |             | 30 |    |    |              | 25 | 51 |    |           | 20 | 25  |     | 43        | 40 | 45 |    |   |
|                |    |    |    |             |    |    |    |              | 47 |    |    |           | 12 | 29  |     | 36        | 34 | 46 | 81 |   |
|                |    |    |    |             |    |    |    |              |    |    |    |           | 79 | 40  | 33  |           | 92 | 33 | 28 |   |
|                | 20 | 23 |    |             | 39 | 58 | 69 |              | 47 | 18 | 35 |           | 20 | 6   | 12  |           | 16 | 4  | 11 | 5 |
|                | 39 | 34 |    |             |    |    |    |              |    |    |    |           | 26 | 26  | 39  |           | 47 | 34 | 52 |   |
| 60             |    |    |    |             |    |    |    |              |    |    |    |           | 73 |     |     |           | 73 |    |    |   |
| 30             | 19 | 33 |    |             | 17 |    |    |              | 21 | 38 |    | 9         | 12 | 23  |     | 10        | 10 | 17 |    |   |
| 34             |    |    |    |             |    |    |    |              | 34 | 34 |    | 16        | 12 | 54  |     | 30        | 32 | 41 |    |   |
|                | 13 | 25 |    |             | 36 | 26 |    |              | 13 | 36 |    | 24        | 14 | 31  |     | 24        | 34 | 18 |    |   |
|                | 85 |    |    |             |    |    |    |              |    |    |    |           | 42 | 50  |     |           | 64 | 50 |    |   |
| 25             |    |    |    |             |    |    |    | 43           |    |    |    | 10        | 54 |     |     | 10        | 21 | 21 |    |   |
|                | 25 |    |    |             |    |    |    |              | 41 | 41 |    | 32        | 25 | 48  |     | 38        | 32 | 22 |    |   |
| 24             |    |    |    |             |    |    |    |              |    |    |    | 19        | 54 |     |     | 15        | 22 | 22 |    |   |
|                | 13 |    |    |             |    |    |    | 64           | 55 |    |    |           | 27 | 20  | 89  |           | 19 | 20 | 79 |   |
|                | 25 | 22 |    |             |    |    |    |              |    |    |    | 21        | 12 | 26  |     | 14        | 17 | 16 |    |   |
|                | 30 | 29 |    |             | 55 |    | 33 |              | 30 | 32 |    | 14        | 11 | 13  | 21  | 21        | 13 | 21 | 19 |   |
|                | 11 | 21 |    |             | 24 |    |    |              | 24 |    |    | 19        | 13 | 23  | 63  | 11        | 13 | 19 | 79 |   |
| 43             | 11 | 22 |    |             | 10 | 46 |    |              | 11 | 15 | 61 | 15        | 16 | 15  | 80  |           | 11 | 17 | 73 |   |
|                | 44 | 50 | 81 |             | 42 |    |    |              | 50 | 60 |    |           | 15 | 47  |     | 31        | 15 | 42 |    |   |
| 44             | 21 |    |    |             | 17 |    |    |              | 35 | 32 |    | 11        | 17 | 26  |     | 29        | 20 | 29 |    |   |
|                | 35 | 50 |    |             |    |    |    |              |    |    |    | 50        | 28 | 42  |     | 57        | 57 | 35 |    |   |
| 31             | 25 | 34 |    |             | 43 | 34 |    |              | 56 | 25 |    | 28        | 28 | 28  |     | 28        | 28 | 28 |    |   |
|                | 17 | 31 | 66 |             |    |    |    |              | 39 | 41 |    | 15        | 12 | 19  | 94  | 14        | 10 | 16 | 79 |   |
| 24             | 62 |    |    |             |    |    |    |              |    |    |    | 18        | 69 |     |     | 14        | 29 | 73 |    |   |
| 7              | 12 | 20 |    |             | 11 | 9  | 44 |              | 13 | 10 | 26 | 64        |    | 12  |     | 8         | 14 | 11 |    |   |
|                | 46 | 61 |    |             | 46 |    |    |              | 53 |    |    | 46        | 53 | 38  |     | 69        | 53 | 30 |    |   |
| 45             | 33 | 46 |    |             | 17 |    |    |              | 49 |    |    | 8         | 9  | 41  |     | 17        | 26 | 24 |    |   |
|                | 50 | 54 |    |             | 75 |    |    |              |    |    |    | 39        | 14 | 54  |     | 13        | 14 | 63 |    |   |

- GO:0007015 (78) actin filament organization
- GO:0031032 (30) actomyosin structure organization
- GO:0019731 (20) antibacterial humoral response
- GO:0002777 (14) antimicrobial peptide biosynthetic process
- GO:0035285 (13) appendage segmentation
- GO:0007420 (79) brain development
- GO:0022416 (38) bristle development
- GO:0000904 (236) cell morphogenesis involved in differentiation
- GO:0030030 (289) cell projection organization
- GO:0007043 (21) cell-cell junction assembly
- GO:0043623 (57) cellular protein complex assembly
- GO:0043624 (23) cellular protein complex disassembly
- GO:0046545 (11) development of primary female sexual characteristics
- GO:0006310 (28) DNA recombination
- GO:0006281 (62) DNA repair
- GO:0007398 (55) ectoderm development
- GO:0060429 (139) epithelium development
- GO:0007163 (76) establishment or maintenance of cell polarity
- GO:0006887 (47) exocytosis
- GO:0001654 (204) eye development
- GO:0048699 (353) generation of neurons
- GO:0007446 (22) imaginal disc growth
- GO:0007560 (198) imaginal disc morphogenesis
- GO:0007447 (69) imaginal disc pattern formation
- GO:0035109 (26) imaginal disc-derived limb morphogenesis
- GO:0006886 (128) intracellular protein transport
- GO:0007612 (40) learning
- GO:0035110 (32) leg morphogenesis
- GO:0051327 (86) M phase of meiotic cell cycle
- GO:0051310 (11) metaphase plate congression
- GO:0007018 (66) microtubule-based movement
- GO:0015672 (121) monovalent inorganic cation transport
- GO:0016071 (139) mRNA metabolic process
- GO:0048747 (49) muscle fiber development
- GO:0006044 (75) N-acetylglucosamine metabolic process
- GO:0010454 (12) negative regulation of cell fate commitment
- GO:0031327 (143) negative regulation of cellular biosynthetic process
- GO:0010629 (140) negative regulation of gene expression
- GO:0010558 (142) negative regulation of macromolecule biosynthetic process
- GO:0045934 (127) negative regulation of nucleobase, nucleoside, nucleotide an
- GO:0043069 (39) negative regulation of programmed cell death
- GO:0006913 (56) nucleocytoplasmic transport
- GO:0009117 (135) nucleotide metabolic process
- GO:0009994 (83) oocyte differentiation
- GO:0030707 (131) ovarian follicle cell development
- GO:0007300 (26) ovarian nurse cell to oocyte transport
- GO:0006119 (96) oxidative phosphorylation
- GO:0006909 (151) phagocytosis
- GO:0007243 (62) protein kinase cascade
- GO:0006464 (484) protein modification process
- GO:0065004 (77) protein-DNA complex assembly
- GO:0006508 (427) proteolysis
- GO:0032956 (23) regulation of actin cytoskeleton organization
- GO:0042659 (15) regulation of cell fate specification
- GO:0022604 (139) regulation of cell morphogenesis
- GO:0032268 (114) regulation of cellular protein metabolic process
- GO:0001505 (83) regulation of neurotransmitter levels
- GO:0002700 (14) regulation of production of molecular mediator of immune resp
- GO:0051252 (437) regulation of RNA metabolic process
- GO:0050803 (31) regulation of synapse structure and activity
- GO:0032774 (442) RNA biosynthetic process
- GO:0006396 (187) RNA processing
- GO:0007431 (112) salivary gland development
- GO:0007606 (123) sensory perception of chemical stimulus
- GO:0007264 (136) small GTPase mediated signal transduction
- GO:0007051 (171) spindle organization
- GO:0031098 (38) stress-activated protein kinase signaling pathway
- GO:0014706 (79) striated muscle development
- GO:0070142 (14) synaptic vesicle budding
- GO:0048488 (32) synaptic vesicle endocytosis
- GO:0048729 (173) tissue morphogenesis
- GO:0006350 (541) transcription
- GO:0006412 (264) translation
- GO:0006901 (13) vesicle coating
- GO:0035220 (186) wing disc development
- GO:0016055 (61) Wnt receptor signaling pathway

| D. melanogast |    |    |    | D. simulans |    |    |    | D. sechellia |    |    |    | D. yakuba |    |    |    | D. erecta |    |    |    |                                                                               |
|---------------|----|----|----|-------------|----|----|----|--------------|----|----|----|-----------|----|----|----|-----------|----|----|----|-------------------------------------------------------------------------------|
| dS            | dN | ω  | Δω | dS          | dN | ω  | Δω | dS           | dN | ω  | Δω | dS        | dN | ω  | Δω | dS        | dN | ω  | Δω |                                                                               |
| 52            | 44 | 44 |    |             |    |    |    |              | 48 | 40 |    | 40        | 24 | 36 |    | 36        | 36 | 40 |    | GO:0008154 (25) actin polymerization or depolymerization                      |
|               |    | 71 |    |             |    |    |    |              |    |    |    |           | 52 | 66 |    |           | 52 | 66 |    | GO:0043297 (21) apical junction assembly                                      |
|               | 31 | 31 |    | 23          | 40 | 46 |    |              | 42 | 44 |    |           | 31 | 17 |    | 27        |    |    |    | GO:0042773 (47) ATP synthesis coupled electron transport                      |
| 39            | 15 | 32 | 77 |             | 21 | 67 |    |              | 39 | 39 |    | 7         | 10 | 25 | 93 | 13        | 28 | 25 |    | GO:0048858 (228) cell projection morphogenesis                                |
|               | 31 | 37 |    |             | 47 | 41 |    |              | 30 | 38 |    |           | 19 | 19 |    | 18        | 11 | 25 |    | GO:0006030 (70) chitin metabolic process                                      |
| 26            | 16 | 33 |    | 44          | 15 |    |    | 60           | 10 |    |    | 13        | 8  | 40 |    | 8         | 8  | 25 |    | GO:0048749 (192) compound eye development                                     |
|               | 84 |    |    |             |    |    |    |              |    |    |    |           | 61 | 76 |    | 61        | 46 | 61 |    | GO:0050907 (13) detection of chemical stimulus involved in sensory perception |
|               |    |    |    |             |    |    |    |              |    |    |    | 30        | 65 |    |    | 55        | 65 |    |    | GO:0035088 (20) establishment or maintenance of apical/basal cell polarity    |
|               | 14 | 35 |    | 29          | 14 |    |    | 55           | 9  |    |    | 8         | 10 | 31 |    | 8         | 14 | 24 |    | GO:0048592 (161) eye morphogenesis                                            |
| 69            | 38 |    |    |             |    |    |    |              |    |    |    | 53        | 61 | 69 |    | 38        | 53 | 76 |    | GO:0035286 (13) leg segmentation                                              |
|               | 78 | 46 | 76 |             | 36 |    |    |              | 40 | 61 |    |           | 21 | 27 |    | 27        | 31 |    |    | GO:0000165 (47) MAPKKK cascade                                                |
|               |    |    | 53 |             |    |    |    |              |    |    |    | 55        | 20 | 25 |    | 46        |    |    |    | GO:0007126 (86) meiosis                                                       |
|               | 12 | 23 |    |             | 11 | 45 |    |              | 12 | 16 | 61 | 8         | 16 | 16 | 81 | 9         | 11 | 18 | 74 | GO:0007052 (155) mitotic spindle organization                                 |
|               | 17 | 30 | 69 |             | 15 | 69 |    |              | 21 | 41 |    | 9         | 14 | 22 | 96 | 9         | 11 | 18 |    | GO:0002009 (139) morphogenesis of an epithelium                               |
|               | 15 |    |    |             |    |    |    |              | 32 | 29 | 72 |           | 23 | 18 | 83 | 80        | 17 | 18 | 78 | GO:0006397 (123) mRNA processing                                              |
| 58            |    |    |    |             |    |    |    |              |    |    |    |           | 75 |    |    | 75        |    |    |    | GO:0009996 (12) negative regulation of cell fate specification                |
| 22            | 15 | 31 | 75 | 38          | 13 | 64 |    |              | 18 | 33 |    | 8         | 10 | 24 |    | 7         | 8  | 12 |    | GO:0030182 (317) neuron differentiation                                       |
| 80            | 14 | 24 |    | 27          | 28 |    |    | 67           | 14 | 36 |    | 16        | 15 | 18 |    | 25        | 11 | 18 |    | GO:0007269 (77) neurotransmitter secretion                                    |
|               |    |    |    |             |    |    |    |              | 27 | 36 | 72 |           | 19 | 30 |    | 12        |    |    |    | GO:0009141 (66) nucleoside triphosphate metabolic process                     |
|               |    |    |    |             |    |    |    |              | 34 | 34 | 64 |           | 41 | 67 |    |           |    |    |    | GO:0009165 (113) nucleotide biosynthetic process                              |
|               |    |    |    | 34          |    |    |    |              |    |    |    | 31        | 20 |    |    | 28        | 17 |    |    | GO:0008355 (35) olfactory learning                                            |
|               |    |    |    | 38          | 33 |    |    |              | 23 | 38 |    | 34        | 15 | 26 |    | 26        | 19 |    |    | GO:0048599 (72) oocyte development                                            |
|               | 47 | 37 |    |             |    |    |    |              | 14 | 52 |    | 25        | 16 |    |    | 33        | 33 |    |    | GO:0007297 (48) ovarian follicle cell migration                               |
|               | 20 | 20 |    |             |    | 77 |    |              | 31 | 28 |    | 20        | 20 | 64 |    | 82        | 27 | 26 |    | GO:0006911 (145) phagocytosis, engulfment                                     |
|               | 11 |    |    | 12          |    |    |    |              | 7  | 51 |    | 13        | 21 |    |    | 22        | 30 | 43 | 82 | GO:0043687 (388) post-translational protein modification                      |
|               | 56 | 56 |    |             |    |    |    |              | 25 | 56 |    | 50        |    |    |    | 43        | 56 | 50 |    | GO:0051261 (16) protein depolymerization                                      |
|               | 37 | 37 |    | 51          | 70 |    |    |              | 66 | 37 |    | 33        | 25 | 22 |    | 44        | 25 | 25 |    | GO:0051258 (27) protein polymerization                                        |
|               | 32 | 34 |    | 26          |    |    |    |              | 26 | 34 | 76 |           | 23 |    |    | 19        |    |    |    | GO:0015992 (52) proton transport                                              |
|               |    |    |    |             |    |    |    |              | 22 | 27 | 72 |           |    |    |    |           |    |    |    | GO:0006163 (83) purine nucleotide metabolic process                           |
|               |    |    |    |             |    |    |    |              |    |    |    | 97        | 60 | 87 |    | 53        | 60 |    |    | GO:0007265 (71) Ras protein signal transduction                               |
| 58            |    |    |    |             |    |    |    | 52           |    |    |    | 41        | 70 |    |    | 58        | 52 |    |    | GO:0030832 (17) regulation of actin filament length                           |
|               | 85 |    |    |             |    |    |    |              |    |    |    |           | 42 | 50 |    | 64        | 50 |    |    | GO:0002784 (14) regulation of antimicrobial peptide production                |
| 55            | 23 |    |    | 38          | 82 |    |    |              |    |    |    | 20        | 20 | 32 |    | 20        | 26 | 52 |    | GO:0031344 (34) regulation of cell projection organization                    |
| 52            | 20 | 34 |    | 72          | 18 |    |    | 44           |    |    |    | 41        | 30 | 37 |    | 27        | 34 | 34 |    | GO:0008360 (70) regulation of cell shape                                      |
|               | 23 |    |    | 74          | 21 |    |    | 76           | 27 | 49 |    | 18        | 12 | 27 |    | 20        | 32 | 58 |    | GO:0050767 (55) regulation of neurogenesis                                    |
|               |    | 53 |    |             |    |    |    |              |    |    |    | 56        | 86 |    |    |           |    |    |    | GO:0010627 (30) regulation of protein kinase cascade                          |
|               |    |    |    |             |    |    |    |              | 88 |    |    | 85        | 61 | 80 |    | 44        | 58 |    |    | GO:0051056 (63) regulation of small GTPase mediated signal transduction       |
|               | 42 |    |    |             |    |    |    | 66           | 42 |    |    | 42        | 47 | 47 |    | 61        | 52 | 33 |    | GO:0050807 (21) regulation of synapse organization                            |
| 25            |    |    |    |             |    |    |    |              |    |    |    | 19        | 73 |    |    | 15        | 43 | 73 |    | GO:0045449 (483) regulation of transcription                                  |
|               |    |    |    |             |    |    |    |              | 24 | 29 | 69 |           |    |    |    |           |    |    |    | GO:0009259 (86) ribonucleotide metabolic process                              |
|               | 19 | 32 |    |             |    |    |    |              | 29 | 37 |    |           | 25 | 19 | 83 | 73        | 25 | 20 |    | GO:0008380 (97) RNA splicing                                                  |
| 60            | 51 | 55 |    |             |    |    |    |              | 44 | 69 |    | 55        | 25 | 39 |    | 27        | 27 | 46 |    | GO:0007608 (43) sensory perception of smell                                   |
|               | 36 | 44 |    | 63          |    |    |    |              | 34 | 40 |    |           | 20 | 20 | 28 |           | 30 | 28 | 28 | GO:0050909 (49) sensory perception of taste                                   |
|               | 18 |    |    | 18          |    |    |    |              | 40 | 43 |    | 18        | 13 | 81 |    | 44        | 18 |    |    | GO:0007519 (65) skeletal muscle development                                   |
|               |    |    |    |             |    |    |    |              | 80 |    |    | 45        | 52 | 69 |    | 42        | 69 |    |    | GO:0006814 (42) sodium ion transport                                          |
| 24            | 26 | 35 |    | 22          | 19 | 42 |    | 59           | 22 | 36 | 71 | 19        | 35 | 28 | 98 | 14        | 22 | 15 | 89 | GO:0051231 (57) spindle elongation                                            |
|               | 31 |    |    |             |    |    |    |              | 50 |    |    | 31        | 37 | 50 |    | 25        | 25 |    |    | GO:0051146 (16) striated muscle cell differentiation                          |
|               | 35 | 50 |    |             |    |    |    |              |    |    |    | 50        | 28 | 42 |    | 57        | 57 | 35 |    | GO:0016185 (14) synaptic vesicle budding from presynaptic membrane            |
| 24            |    |    |    |             |    |    |    |              |    |    |    | 19        | 54 |    |    | 15        | 22 | 22 |    | GO:0006351 (441) transcription, DNA-dependent                                 |
|               | 35 | 38 |    | 19          | 71 |    |    |              |    |    |    | 8         | 9  | 44 |    | 18        | 26 | 25 |    | GO:0007472 (146) wing disc morphogenesis                                      |
