# Supplementary material for: Natural Selection on Functional Modules, a Genome-Wide Analysis
Source: PubMed Central journal article supplement (PMC3048381; doi:10.1371/journal.pcbi.1001093), 2011-03-03

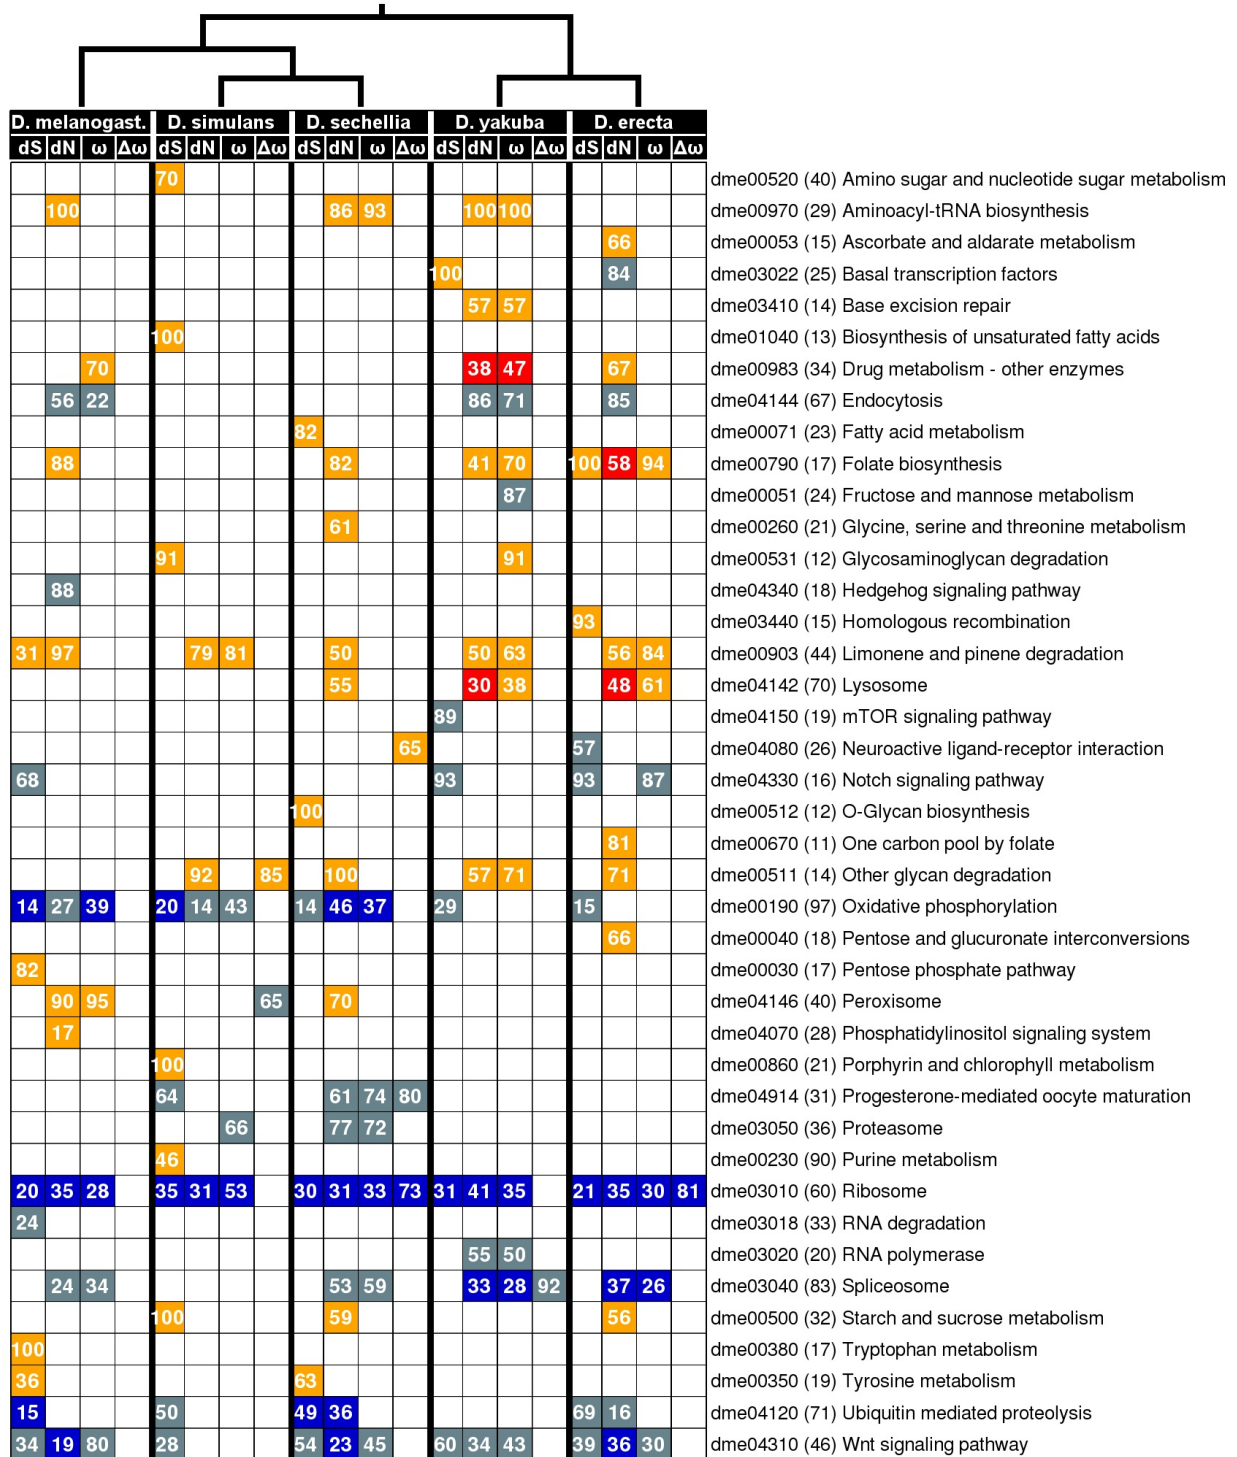

Supplement: pcbi.1001093.s004.pdf [file pcbi.1001093.s004.pdf]
