# Supplementary material for: Natural Selection on Functional Modules, a Genome-Wide Analysis
Source: PubMed Central journal article supplement (PMC3048381; doi:10.1371/journal.pcbi.1001093), 2011-03-03

A

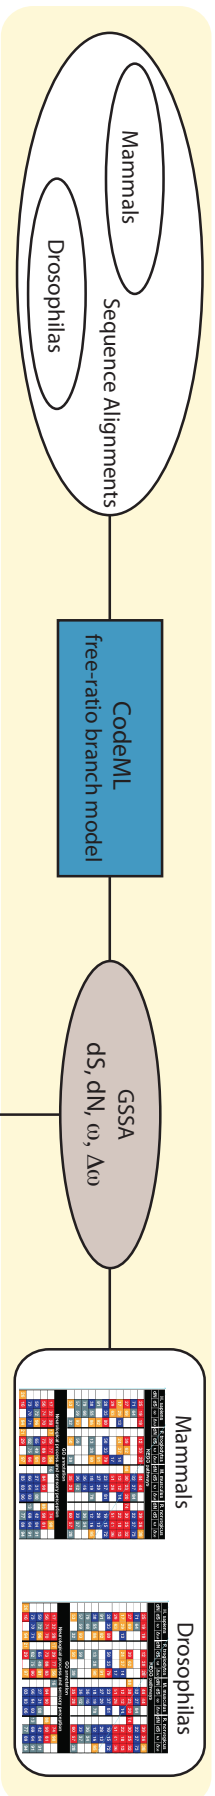

Obtain 10,000 randomized data for each evolutionary statistics ( $dS$ ,  $dN$ ,  $\omega$ ,  $\Delta\omega$ ) by arbitrary changing the ENSG assignment to the original list of ranked values and functional annotations

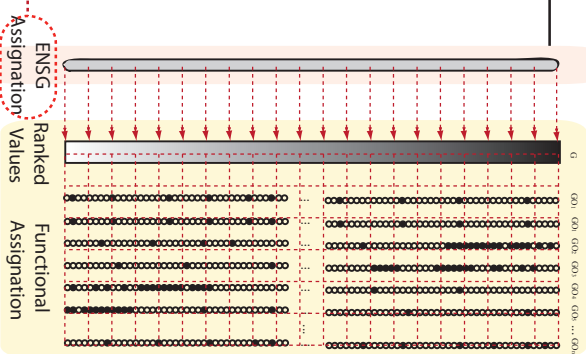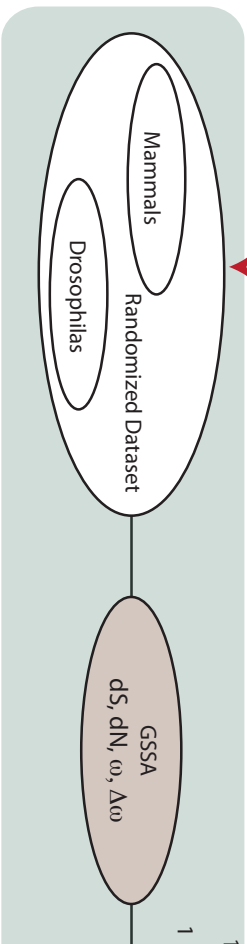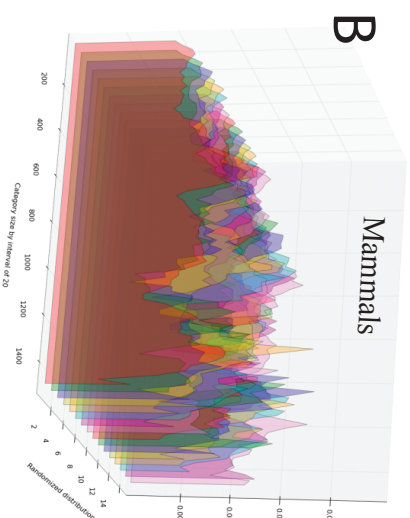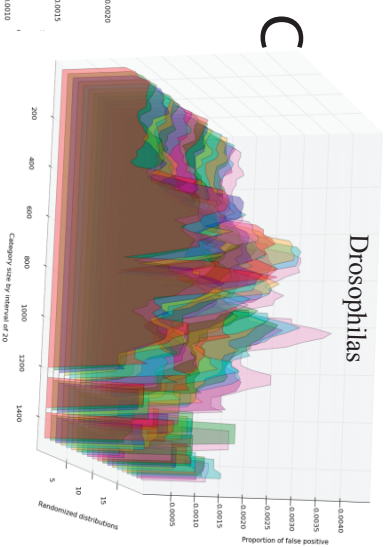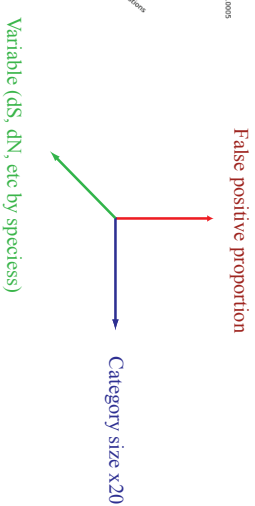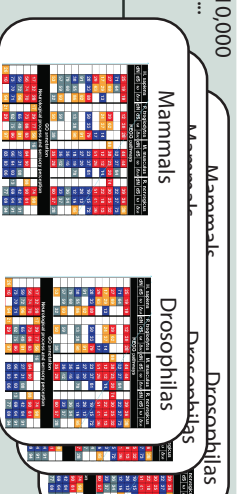

Count the number of false positives (red+orange and cyan+blue boxes over 10.000) considering the functional category size in each randomized variable

# B

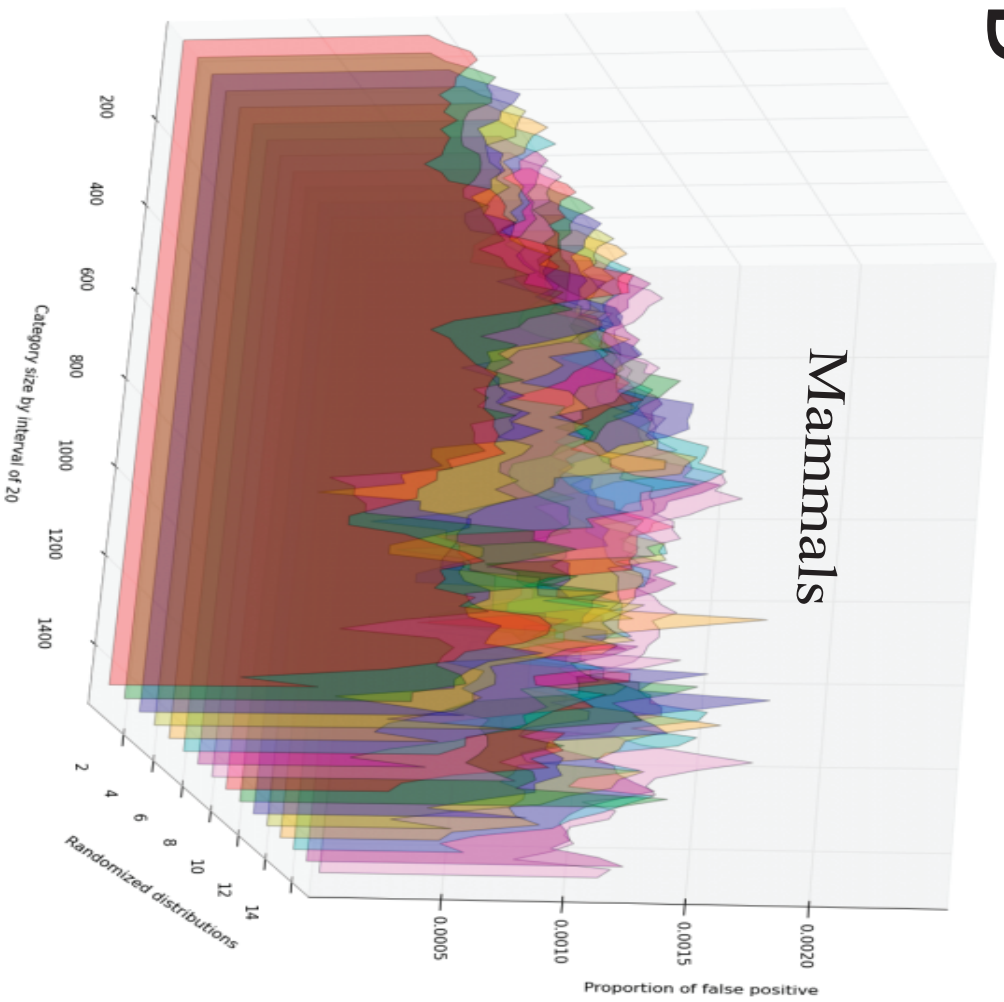

False positive proportion

Category size x20

Variable ( $ds$ ,  $dN$ ,  $\omega$ ,  $\Delta\omega$ )

# C

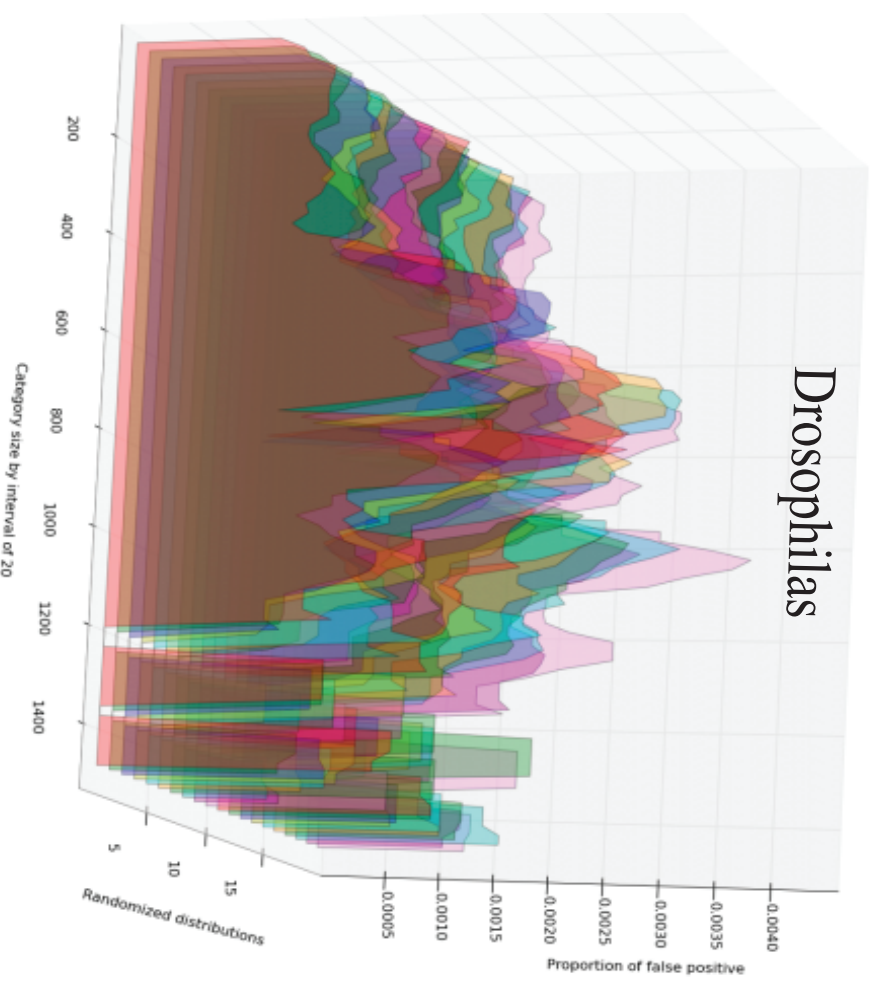

Supplement: pcbi.1001093.s005.pdf [file pcbi.1001093.s005.pdf]
