# Supplementary material for: Natural Selection on Functional Modules, a Genome-Wide Analysis
Source: PubMed Central journal article supplement (PMC3048381; doi:10.1371/journal.pcbi.1001093), 2011-03-03
Supplement: pcbi.1001093.s006.pdf [file pcbi.1001093.s006.pdf]

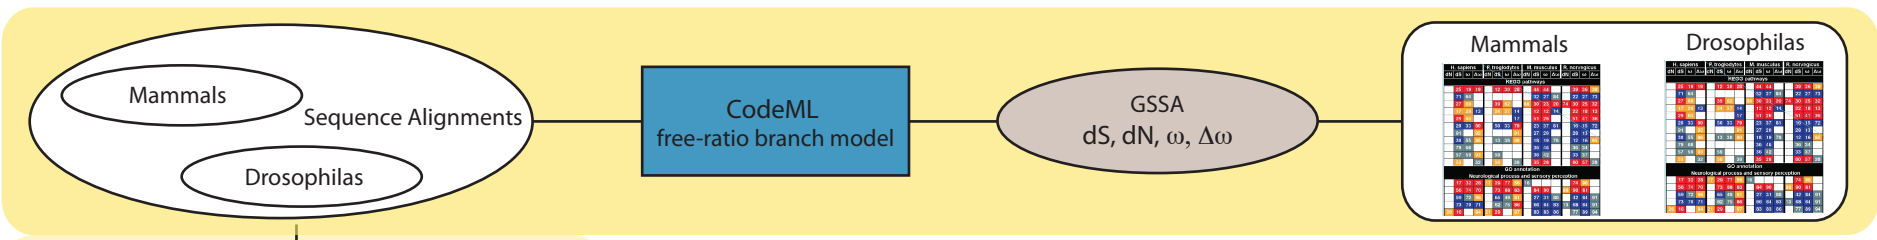

**Real Data**

★ **CodeML forces** **Statistical Model**

| Evolutionary Scenario | Branch Site |
|-----------------------|-------------|
| Purifying Selection   | M0          |
| Relaxation            | A1          |
| Positive Selection    | A           |

Extract Parameters  
( $TL, S, N, \tau, \pi, k, \omega, \kappa, \Pi, \dots$ )

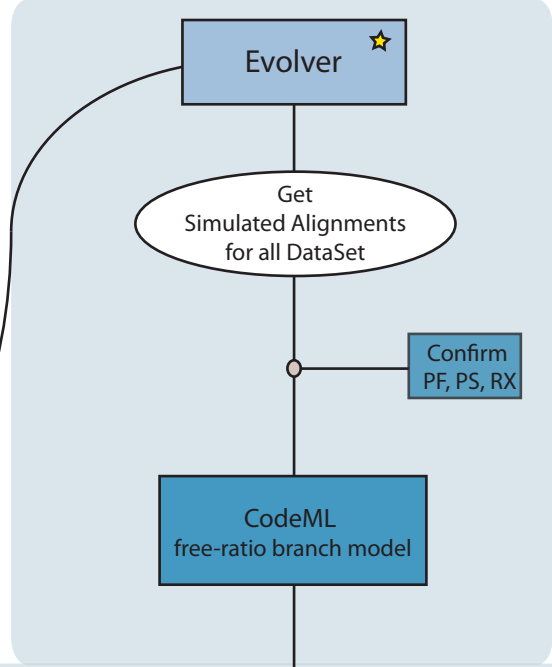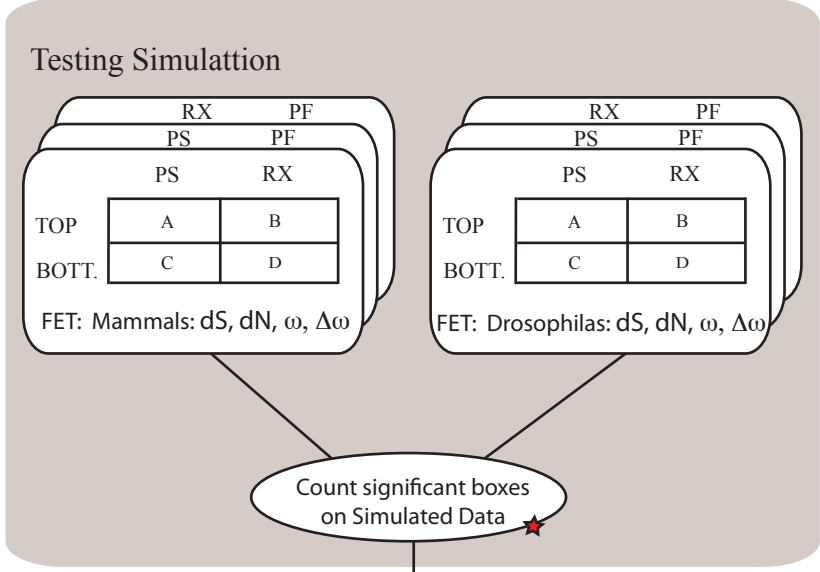

★ Count on Human, mouse, *D. melanogaster* & *D. erecta* used as foreground species

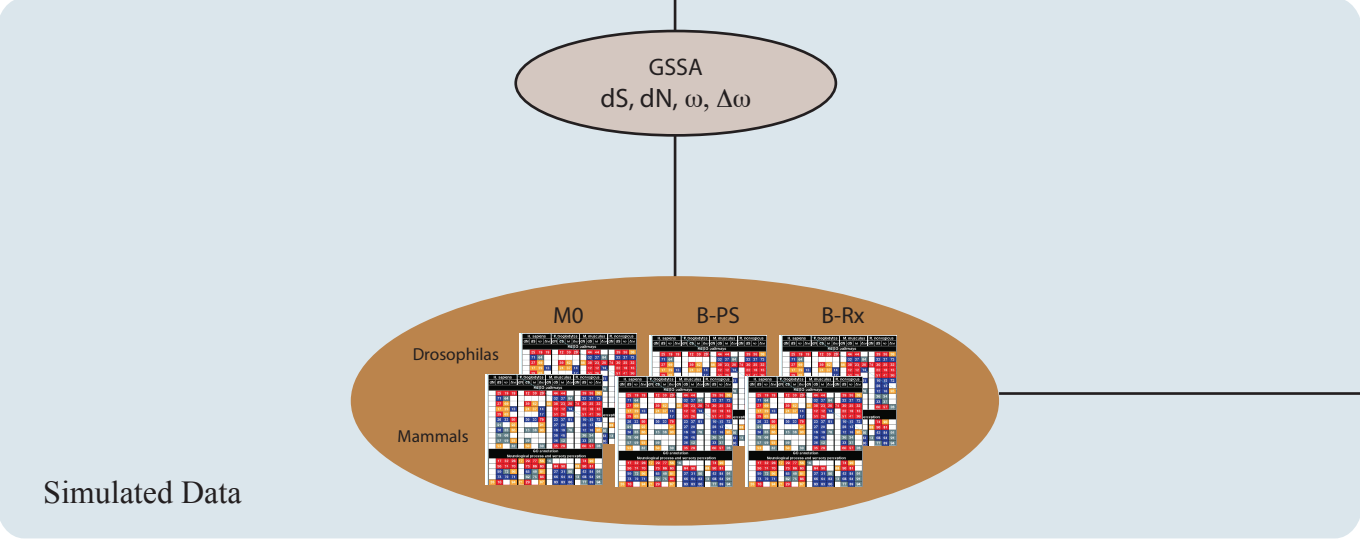

★ Human, mouse, *D. melanogaster* & *D. erecta* used as foreground species in branch and branch-site models
