# Supplementary material for: Natural Selection on Functional Modules, a Genome-Wide Analysis
Source: PubMed Central journal article supplement (PMC3048381; doi:10.1371/journal.pcbi.1001093), 2011-03-03
Supplement: pcbi.1001093.s009.pdf [file pcbi.1001093.s009.pdf]

| Biological process                                             | Functional category enriched by PSGs<br>(Reference #) |      |    |      |   |      |    | GSSA results                                         |                         |
|----------------------------------------------------------------|-------------------------------------------------------|------|----|------|---|------|----|------------------------------------------------------|-------------------------|
|                                                                | 1                                                     | 2    | 3  | 4    | 5 | 6    | 7  | SH $\omega$                                          | SL $\omega$             |
| Olfaction / Sensory perception of smell                        | H                                                     | Pr** |    |      |   | Pr** |    | H**, C**, M**, R**<br>Dmel*, Dsec*, Dere**, Dyak**   |                         |
| Chemosensory perception                                        | H                                                     | Pr** |    |      |   |      |    | H**, C**, M**, R**<br>Dmel**, Dsec**, Dere**, Dyak** |                         |
| G-protein-mediated signaling                                   | H                                                     |      |    |      | H | Pr** |    | H**, C**, R*                                         |                         |
| DNA/nucleic acid metabolism                                    |                                                       |      |    | C    |   |      | Ds | C*, M**, R**,<br>Dmel**, Dyak**, Dere*               |                         |
| Amino acid metabolism                                          | H, C                                                  |      |    |      |   |      | Ds | M**, R**                                             |                         |
| Proteolysis                                                    |                                                       |      |    |      |   |      | Ds | M**, R**,<br>Dmel**, Dsim*, Dsec*, Dyak**, Dere**    |                         |
| Fatty acid/Lipid metabolism                                    |                                                       |      |    |      | H |      | Ds | M**, R**                                             |                         |
| Carbohydrate metabolism                                        |                                                       |      |    |      |   |      | Ds | Dsec*, Dyak*, Dere*                                  |                         |
| Adult reproduction and gametogenesis                           |                                                       |      |    |      |   |      | Ds | Dsec*                                                |                         |
| Spermatogenesis and motility                                   |                                                       | Pr*  | Pr |      |   |      |    | H*, M*, Dmel*                                        |                         |
| Immune response                                                |                                                       | Pr** |    | H, C |   | Ro** |    | C*, M**, R**, Dyak*, Dere*                           |                         |
| Inflammatory response                                          |                                                       |      |    |      |   | Ro** |    | H*, C*, M**, R**                                     |                         |
| Defense response                                               |                                                       |      |    |      |   | Ro** |    | H*, C*, M**, R**, Dyak**, Dere*                      |                         |
| Response to wounding                                           |                                                       |      |    |      |   | Ro** |    | H*, M**, R**                                         |                         |
| Humoral immune response mediated by circulating immunoglobulin |                                                       |      |    |      |   | Ro** |    | M**, R**                                             |                         |
| T-cell-mediated immunity                                       |                                                       | Pr** |    |      |   |      |    | M*                                                   |                         |
| Natural killer-cell-mediated immunity                          |                                                       | Pr*  |    |      |   |      |    | R*                                                   |                         |
| B-cell- and antibody-mediated immunity                         |                                                       | Pr*  |    |      |   |      |    | M**, R**                                             |                         |
| Response to pest, pathogen, or parasite                        |                                                       |      |    | H    |   |      |    | C*, M**, R**, Dyak*, Dere*                           |                         |
| Stress response                                                |                                                       |      |    |      | C | Ro** |    | M**, R**                                             |                         |
| Response to external stimulus                                  |                                                       |      |    |      |   | Ro** |    | M**, R*                                              |                         |
| Sensory Perception                                             | H                                                     | Pr** |    | H    |   | Pr** |    | H**, C**, M*,<br>Dmel**, Dsec**, Dyak**, Dere**      | R*                      |
| Cell surface receptor-mediated signal transduction             | H                                                     |      |    |      |   | Pr** |    | C*                                                   | Dmel*, Dyak*, Dere*     |
| Cell adhesion                                                  | H                                                     |      |    |      |   |      |    | R*                                                   | H**, C**, Dmel**, Dere* |
| Amino acid transport                                           |                                                       |      | Pr |      |   |      |    | M*                                                   | R*                      |
| Protein amino acid glycosylation                               |                                                       |      | Pr |      |   |      |    | M*                                                   | H*                      |
| Amino acid transport                                           | C                                                     |      |    |      |   |      |    | M*                                                   | C*                      |
| Hearing / Perception of sound                                  | H                                                     |      | Pr |      |   |      |    |                                                      | M*, R*                  |
| Neurological process                                           |                                                       |      |    |      |   | Pr** |    |                                                      | M**, R**, Dyak*, Dere*  |
| Synaptic transmission                                          |                                                       |      | Pr |      |   |      |    | H**, M**, R**,<br>Dmel**, Dsec**, Dere**, Dyak**     |                         |
| Signal transduction/intracellular signaling cascade            | H, C                                                  |      | Pr |      |   |      | Ds | H**, C**, M**, R**,<br>Dmel**, Dsec*, Dyak**, Dere** |                         |
| Ion transport                                                  | H                                                     |      |    |      | H |      | Ds | H*, M**, R**, Dmel*, Dsec*, Dere*                    |                         |
| Potassium ion transport                                        |                                                       |      | Pr |      |   |      |    | H*, C*, M**, R**                                     |                         |
| Inorganic anion transport                                      |                                                       |      | Pr |      |   |      |    | M*, R*                                               |                         |

|                                        |   |     |      |   |  |    |  |                                                          |
|----------------------------------------|---|-----|------|---|--|----|--|----------------------------------------------------------|
| Intracellular protein traffic          | H |     |      |   |  |    |  | H**, C**, M**, R**, Dmel*, Dsec**, Dyak**, Dere*         |
| Transport                              |   |     |      |   |  | Ds |  | Dmel**, Dsec**, Dere**, Dyak**                           |
| Protein transport                      |   |     | H    |   |  | Ds |  | H*, C**, M**, R**, Dmel**, Dsim*, Dsec**, Dere**, Dyak** |
| Metabolism of cyclic nucleotides       | H |     |      |   |  |    |  | M*, R*                                                   |
| Protein metabolism & modification      |   |     | H, C | C |  | Ds |  | H**, C**, M**, R**, Dere*, Dyak*                         |
| Phosphate metabolism/phosphorylation   |   |     | H, C |   |  | Ds |  | H*, C*, M**, R**, Dmel*, Dsec**, Dyak**, Dere*           |
| Purine metabolism                      | C |     |      |   |  |    |  | M*, R*, Dsec**                                           |
| Carbohydrate biosynthesis              |   | Pr  |      |   |  |    |  | M**, R*                                                  |
| Cation transport                       | H |     |      |   |  |    |  | H*, M**, R**                                             |
| Nervous system development             |   |     |      |   |  | Ds |  | H*, M**, R**, Dmel**, Dsec*, Dyak**, Dere**              |
| Skeletal development                   | C |     |      |   |  |    |  | M**, R**                                                 |
| Organ development                      |   |     |      |   |  | Ds |  | H*, M**, R**, Dmel**, Dsec*, Dyak**, Dere**              |
| Post-embryonic development             |   |     |      |   |  | Ds |  | M*, Dmel*, Dyak**, Dere*                                 |
| Embryonic development                  |   |     |      |   |  | Ds |  | H**, C*, M**, R**, Dyak*, Dere*                          |
| Ectoderm development                   |   |     |      | H |  |    |  | C*, M*, R*, Dmel*, Dyak*, Dere*                          |
| Cell proliferation and differentiation | C |     |      |   |  | Ds |  | H**, C*, M**, R**, Dmel**, Dsec*, Dyak**, Dere**         |
| Cell cycle                             |   |     |      |   |  | Ds |  | H*, M*, R*, Dmel**, Dsec**, Dyak**, Dere**               |
| Cell structure/morphogenesis           | C |     |      |   |  | Ds |  | H**, C*, M**, R**, Dmel**, Dsec*, Dyak**, Dere**         |
| Cell structure and motility            | C |     |      |   |  |    |  | H*, M**, R**, Dsec*                                      |
| Inhibition of apoptosis                |   | Pr* |      |   |  |    |  | H*, Dyak*                                                |
| Cell-cell signalling                   |   |     |      |   |  | Ds |  | H**, C*, M**, R**, Dmel**, Dsec**, Dere**, Dyak**        |
| Regulation of nucleobase               |   |     | H, C |   |  |    |  | H**, C**, M**, R**, Dere*                                |
| Translation                            |   |     |      |   |  | Ds |  | M*, R*, Dmel**, Dsim*, Dsec**, Dyak**, Dere**            |
| Transcription                          |   |     | H, C | C |  | Ds |  | H**, C**, M**, R**, Dere*                                |
| Protein catabolism                     |   |     | H, C | C |  |    |  | H**, C**, M**, R**                                       |
| Lipid transport                        |   | Pr  |      |   |  |    |  |                                                          |
| Phosphate transport                    |   |     |      | H |  |    |  |                                                          |
| Oncogenesis                            | C |     |      |   |  |    |  |                                                          |
| Interferon-mediated immunity           |   | Pr* |      |   |  |    |  |                                                          |
