# Supplementary material for: Natural Selection on Functional Modules, a Genome-Wide Analysis
Source: PLOS journal article supplement (doi:10.1371/journal.pcbi.1001093), 2011-03-03
Supplement: S10 (10.1371/journal.pcbi.1001093.s010) [file journal.pcbi.1001093.s010]

301 Moved Permanently

# Moved Permanently

The document has moved here.

---

Apache Server at www.ploscompbiol.org Port 80
